# Supplementary material for: Single cell sequencing reveals cell populations that predict primary resistance to imatinib in chronic myeloid leukemia
Source: Aging (Albany NY). 2020 Nov 23;12(24):25337–55. doi: 10.18632/aging.104136 (PMC7803567; doi:10.18632/aging.104136)
Supplement: Supplementary Table 1 [file aging-12-104136-s002.xlsx]

## Sheet: Table S1
Supplementary Table 1. Clinical information
				Before treatment	Before treatment	Before treatment	Before treatment	Before treatment	Before treatment	Before treatment	Before treatment	After treatment	After treatment	After treatment	After treatment	After treatment	Blast crisis and before treatment	Blast crisis and before treatment	Blast crisis and before treatment	Blast crisis and before treatment	Blast crisis and before treatment	Blast crisis and before treatment	Blast crisis and before treatment	Blast crisis and before treatment	Blast crisis and after treatment	Blast crisis and after treatment	Blast crisis and after treatment	Blast crisis and after treatment	Blast crisis and after treatment	Blast crisis and after treatment
Patitent	Age	Gender	Disease	WBC in peripheral blood（×109/L）	Primitive cell in peripheral blood (%)	Eosinophilic granulocyte in peripheral blood (%)	Basophilic granulocyte in peripheral blood (%)	Platelet in peripheral blood（×109/L）	Primitive cell in bone marrow (%)	BCR-ABL in bone marrow	Therapeutic regimen	WBC in peripheral blood（×109/L）	Primitive cell in peripheral blood (%)	Eosinophilic granulocyte in peripheral blood (%)	Basophilic granulocyte in peripheral blood (%)	Platelet in peripheral blood（×109/L）	WBC in peripheral blood（×109/L）	Primitive cell in peripheral blood (%)	Eosinophilic granulocyte in peripheral blood (%)	Basophilic granulocyte in peripheral blood (%)	Platelet in peripheral blood（×109/L）	Primitive cell in bone marrow (%)	BCR-ABL in bone marrow	Therapeutic regimen	WBC in peripheral blood（×109/L）	Primitive cell in peripheral blood (%)	Eosinophilic granulocyte in peripheral blood (%)	Basophilic granulocyte in peripheral blood (%)	Platelet in peripheral blood（×109/L）	BCR-ABL in bone marrow
P01	40	Male	Chronic myeloid leukemia	132	0.04	0.024	0.037	330	0.015	positive	Imatinib 400mg qd	3.14	0	2.2	1.3	254	-	-	-	-	-	-	-	-	-	-	-	-	-	-
P02	39	Male	Chronic myeloid leukemia	154.8	0.01	0.029	0	407	0.016	positive	Imatinib 400mg qd	6.3	0	0.5	9	237	-	-	-	-	-	-	-	-	-	-	-	-	-	-
P03	75	Male	Chronic myeloid leukemia	57.47	-	0.001	0.006	450	0.115	positive	Imatinib 400mg qd	1.84	-	0.005	0.005	77	-	-	-	-	-	-	-	-	-	-	-	-	-	-
P04	59	Male	Chronic myeloid leukemia	352	0.05	0.006	0.018	353	0.025	positive	Imatinib 400mg qd	4.68	0	2.1	1.5	147	5.2	0	4	1.3	158	0.85	86.61% (ABL M244V mutation)	Dasatinib 100mg d1-d3; Dasatinib 140mg d4-d30+VP	3.27	0	1.2	0.3	97	0.0156
N	45	Male	Healthy	-	-	-	-	-	-	-	-	-	-	-	-	-	-	-	-	-	-	-	-	-	-	-	-	-	-	-
