# Supplementary material for: Single cell sequencing reveals cell populations that predict primary resistance to imatinib in chronic myeloid leukemia
Source: Aging (Albany NY). 2020 Nov 23;12(24):25337–55. doi: 10.18632/aging.104136 (PMC7803567; doi:10.18632/aging.104136)
Supplement: Supplementary Table 3 [file aging-12-104136-s004.xlsx]

## Sheet: Table S3
Supplementary Table 3. Gene modules introduced for cell cycle scoring or lineage priming scoring
Cell cycle modules		Lineage modules
S phase (Seurat)	G2M phase (Seurat)	B (Velten et al)	N (Velten et al)	ME (Velten et al)	MD (Velten et al)	EBM (Velten et al)
MCM5	HMGB2	VPREB3	PRTN3	KEL	SCT	PRG2
PCNA	CDK1	CLNK	CSTA	FAM178B	LILRA4	MS4A2
TYMS	NUSAP1	EBF1	MPO	CXADR	TLR7	ENPP3
FEN1	UBE2C	ID3	RNASE3	CA1	PTPRS	ALOX5
MCM2	BIRC5	MME	CEBPD	RBPMS2	CD2	NR4A3
MCM4	TPX2	CLEC14A	RHOU	CDH1	HS3ST1	BACE2
RRM1	TOP2A	CHST15	LPO	KLF1	ADAM19	NTRK1
UNG	NDC80	CD79A	ELANE	DMTN	IGF2R	DHRS9
GINS2	CKS2	SH2D1A	SLITRK4	CSF1	SMPD3	CKAP4
MCM6	NUF2	CCDC141	AZU1	ANK1	SULF2	SYTL3
CDCA7	CKS1B	LTB	PRRT4	CA2	IRF4	ANGPT2
DTL	MKI67	WFS1	PADI2	APOL4	TIGAR	ZCCHC24
PRIM1	TMPO	CYGB	MS4A3	CDC14B	IL18R1	SLC2A6
UHRF1	CENPF	JCHAIN	LONRF3	TFR2	KIAA0226L	ARSG
MLF1IP	TACC3	VPREB1	F13A1	FUT1	SHD	LTBP1
HELLS	FAM64A	IL7R	NAIP	SMIM1	JCHAIN	HPGD
RFC2	SMC4	CD22	CST7	HBB	MYO1E	AKAP12
RPA2	CCNB2	FCMR	IGFBP2	XK	LGMN	ALOX5AP
NASP	CKAP2L	IL24	CACNA2D3	IRF6	CLEC4A	WIPI1
RAD51AP1	CKAP2	RASD1	HBEGF	MFSD2B	IRF7	SLC2A10
GMNN	AURKB	UMODL1	BZRAP1	GJA4	MCOLN2	TNFRSF19
WDR76	BUB1	CD79B	KLF2	ICAM5	BCAR3	ITGB8
SLBP	KIF11	SGCB	KBTBD11	CD36	FAM129C	LMO4
CCNE2	ANP32E	DDIT4	ARG1	LRRC2	MPEG1	SLC24A3
UBR7	TUBB4B	HHIP	LYST	SPTB	AHNAK2	LTC4S
POLD3	GTSE1	FAM129C	GRIP1	GATA1	ST14	RAB27B
MSH2	KIF20B	SOCS1	RNASE2	FREM1	CCDC50	SLC45A3
ATAD2	HJURP	LCK	CACNA1A	FHL2	RASD1	RGS1
RAD51	CDCA3	AKAP12	TMTC2	EPOR	LY9	TPSAB1
RRM2	HN1	IL2RA	HAL	CCND1	MS4A4A	GATA2
CDC45	CDC20	SCN3A	ZNF467	PROS1	COBL	CXCR4
CDC6	TTK	DFNA5	HRH2	GP1BB	RNASE6	MS4A3
EXO1	CDC25C	COBL	LYZ	KLHL35	UGCG	SRGN
TIPIN	KIF2C	ARPP21	SLC26A8	FN3K	IRF8	NTNG2
DSCC1	RANGAP1	FGD6	CD93	HBD	HEG1	CSF2RB
BLM	NCAPD2	P2RY10	CITED4	SIX5	DUSP4	TPCN1
CASP8AP2	DLGAP5	PXDN	CFD	TRIB2	SIGLEC5	PLD1
USP1	CDCA2	NEIL1	KCNE5	BLVRB	KIF17	SLC18A2
CLSPN	CDCA8	KLHL25	CLEC12A	CNRIP1	SEL1L3	NEB
POLA1	ECT2	MMP11	CEBPA	EPCAM	TBC1D8	SLC4A8
CHAF1B	KIF23	SH3TC1	C16orf74	PLEKHG1	ALOX5AP	RUNX1
BRIP1	HMMR	CCR7	LIN7A	DLC1	FBP1
E2F8	AURKA	ISG20	C1QTNF4	PPP1R14A	TP53I11
	PSRC1	NHLRC4	MAP1B	TPM1	CYBB
	ANLN	BLNK	SERPINB8	LMNA	CCR7
	LBR	UBASH3B	HGF	LTBP2	ARL4C
	CKAP5	TNFSF8	FOSL2	KIAA0513	SYNE2
	CENPE	DUSP4	KIAA0930	PLIN2	NCF1
	CTCF	TP53INP1	SRGN	ANKRD9	ZCCHC24
	NEK2	PAG1	SIRPB2	KCNH2	COBLL1
	G2E3	LY9	DGKG	SLC2A4	LSP1
	GAS2L3	PDE9A	SLC22A15	FAM83D	PLD4
	CBX5	PRKCE	MTMR11	ICAM4	GPR183
	CENPA	LGMN	IRAK2	MICAL2	FGD2
		CD19	TLR4	PNMT	BLNK
		GPR132	FAM107B	FAM65C	TNFRSF21
		PRX	B4GALT5	HSD3B7	SCN9A
		ZAP70	PRKCD	GFI1B	STAT4
		ZC3H12D	NDRG1	TNFAIP6	IL3RA
		GRASP	RAB31	TMOD1	LIME1
		MUC20	CSF1R	MTSS1	ABHD12B
		CD96	SLC1A3	PRKG1	PTPRJ
		LAT2	SERPINI2	TNFRSF25	SAMHD1
		BACH2	IL6R	GMPR	ABCG2
		CERS4	SLC15A2	MINPP1	ADGRG5
		SOCS2	CECR1	ECE1	TCF4
		PLK2	NKG7	GAD1	CEP55
		LRRC26	LY86	XKR6	SLC2A6
		CSRNP1	ITPRIPL2	PTGS1	JAML
		SLC38A1	NLGN3	TEK	CDH23
		TMEM200A	FUT4	SLC40A1	CDKN2D
		LILRB1	TIMP2	AFAP1L1	PLAC8
		MYLK	RGCC	DHRS3	SNX18
		CD72	IL13RA1	GAS2L1	E2F2
		LEF1	COLGALT2	ZFP36L1	HERPUD1
		P2RY14	FNDC3B	C6orf25	CYTH4
		CYFIP2	MS4A6A	DNAJC6	ESPL1
		MN1	MEF2D	FKBP1B	CRIP1
		CDKN2D	EGR1	CLCN4	CST3
		LDLRAD4	TLR2	IL7	SGCB
		DNAH10	CTSG	PDLIM1	RBM47
		ZCCHC7	ZBTB47	C2orf88	CARD11
		CD52	WDR49	TMEM246	EML5
		SATB1	SAMHD1	CTNNBL1	C12orf75
		STAP1	FOSB	HNRNPLL	CORO1A
		SH2D3C	ODF3B	ST6GAL2	FCER1G
		LPXN	UPP1	SPTBN2	PPP1R16B
		HS3ST3B1	RFX8	PTRF	ID2
		CCDC24	MT-ND6	CSF2RB	SMIM14
		CYTH4	MROH6	P2RX5	KCTD12
		TSPAN7	C21orf62	STXBP6	CSF2RA
		CCDC121	FAM46A	STON2	CCND3
		ADA	MRC2	LAT	ACY3
		FAM134B	LGALS1	TSPAN6	ITM2C
		C10orf10	CLEC11A	SLC25A15	HLA-DRA
		IGFBP6	EMILIN2	STEAP3
		TLE1	RAB44	ADRA2A
		C5orf56	SLC2A5	ITGA2B
		AGPS	ATP8B4	ABCB6
		TCF4	HNMT	UROD
		RCSD1	FBP1	MYC
			CASC1	NFIA
			CSF3R	EPB42
			MTSS1L	FECH
			IL17RA	FBXO7
			CMTM4	ALDH1A1
			C9orf66	GATA2
			TOP1MT	TFRC
			SIRPA	STRADB
			RAB32	PIR
			PRAM1	MTCL1
			SLC3A1	FCER1A
			MAMDC4	RYR3
			CALR	LXN
			FBXO16	MYH10
			MT-ND1	ALAD
				ITGB4
				GDPD1
				CASP3
				FAM46C
				SEC14L2
				ATP7B
				FAM213B
				PYCR1
				PCYT2
				SEMA3C
				CD82
				CRYM
				ABCC4
				MPC2
				ST8SIA6
				TAL1
				DEGS2
				ELOVL6
				NEDD4L
				LPCAT3
				FAM210B
				SGPP1
				HOOK1
				NPL
				AKR1C1
				S100A4
				FADS3
				AK1
				PNPO
				CTH
				TST
				EMP3
				TRIM58
				FTH1
				PKIG
				SUCLG2
				S100A6
				HMBS
