# Supplementary material for: Single cell sequencing reveals cell populations that predict primary resistance to imatinib in chronic myeloid leukemia
Source: Aging (Albany NY). 2020 Nov 23;12(24):25337–55. doi: 10.18632/aging.104136 (PMC7803567; doi:10.18632/aging.104136)
Supplement: Supplementary Table 4 [file aging-12-104136-s005.xlsx]

## Sheet: Table S4
Supplementary Table 4. Expression signatures in Clu-CD34 and Clu-MPO
Gene	Cluster	Expression signature	Average Fold change	FDR
AZU1	Clu-MPO	0.92	4.1731	0
PRTN3	Clu-MPO	0.596	3.53549	0
MPO	Clu-MPO	0.75	3.1919	0
ELANE	Clu-MPO	0.611	2.7133	0
CTSG	Clu-MPO	0.486	2.401	0
CLEC11A	Clu-MPO	0.757	2.11716	0
PRSS57	Clu-MPO	0.816	2.07142	0
CFD	Clu-MPO	0.839	1.93119	0
RP11-620J15.3	Clu-MPO	0.696	1.79792	0
IGFBP7	Clu-MPO	0.693	1.63203	0
STMN1	Clu-MPO	0.639	1.30281	0
RAB32	Clu-MPO	0.495	1.29545	0
ITM2C	Clu-MPO	0.548	1.1345	0
C19orf77	Clu-MPO	0.402	1.03683	0
EBPL	Clu-MPO	0.509	1.03188	0
MS4A3	Clu-MPO	0.216	0.912961	0
AF064858.8	Clu-MPO	0.306	0.898307	0
RAB13	Clu-MPO	0.288	0.76291	0
C1QTNF4	Clu-MPO	0.192	0.698466	0
NPW	Clu-MPO	0.15	0.606985	0
MSRB3	Clu-MPO	0.186	0.582753	0
TM4SF1	Clu-MPO	0.15	0.507376	0
RNASE3	Clu-MPO	0.112	0.44602	0
UGT3A2	Clu-MPO	0.135	0.440165	0
STAR	Clu-MPO	0.104	0.393629	0
RNASE2	Clu-MPO	0.306	0.864094	3.742e-288
CEBPA	Clu-MPO	0.165	0.552356	4.18148e-287
C1orf228	Clu-MPO	0.435	0.974125	1.62353e-276
KIAA0101	Clu-MPO	0.313	0.973127	1.03473e-272
GAPDH	Clu-MPO	0.989	1.35639	1.74427e-260
FABP5	Clu-MPO	0.376	0.847627	1.04758e-255
CEBPD	Clu-MPO	0.328	0.916649	1.28671e-255
TNFSF13B	Clu-MPO	0.579	1.02731	3.31834e-247
B2M	Clu-MPO	0.992	-1.62265	1.28031e-242
CAT	Clu-MPO	0.689	1.28149	1.2113e-240
LGALS1	Clu-MPO	0.953	1.41714	1.87087e-234
IGLL1	Clu-MPO	0.199	0.93082	1.9175e-233
CSF3R	Clu-MPO	0.404	0.855343	2.10455e-230
NUCB2	Clu-MPO	0.592	1.17616	1.40865e-223
MALAT1	Clu-MPO	0.966	-1.49487	1.96061e-216
C10orf11	Clu-MPO	0.19	0.571787	1.89832e-214
PRAM1	Clu-MPO	0.3	0.760047	3.6629e-212
NPDC1	Clu-MPO	0.288	0.674304	1.12548e-210
SERPINB1	Clu-MPO	0.755	1.14092	1.34274e-206
FLT3	Clu-MPO	0.144	0.444191	2.20906e-206
RPL12	Clu-MPO	1	0.800335	1.8233e-202
HMGA1	Clu-MPO	0.467	0.880535	1.20002e-199
NAALADL1	Clu-MPO	0.214	0.545204	5.0799e-199
SRGN	Clu-MPO	0.954	1.50351	1.71545e-197
CDK6	Clu-MPO	0.256	0.639366	9.68483e-195
RPLP1	Clu-MPO	1	0.670272	6.96983e-192
SCCPDH	Clu-MPO	0.298	0.704814	1.36926e-188
CEACAM4	Clu-MPO	0.137	0.443703	3.00191e-180
CALR	Clu-MPO	0.609	0.991395	6.3101e-180
NPM3	Clu-MPO	0.34	0.765394	1.12627e-179
HMGB2	Clu-MPO	0.736	1.07876	1.49587e-177
RPS2	Clu-MPO	1	0.598108	5.235e-177
ERLIN1	Clu-MPO	0.123	0.410049	3.69407e-175
ANKRD28	Clu-MPO	0.18	0.483183	6.96106e-171
VAMP8	Clu-MPO	0.898	1.04079	9.32867e-170
TUBA1B	Clu-MPO	0.761	1.16286	7.80347e-166
CD52	Clu-MPO	0.07	-2.81827	3.59596e-164
HLA-C	Clu-MPO	0.581	-1.84249	9.18275e-164
HLA-B	Clu-MPO	0.759	-1.49426	4.20737e-161
HSPB1	Clu-MPO	0.573	0.878281	1.39407e-160
RPS4X	Clu-MPO	0.998	0.617091	8.20247e-156
RPS6	Clu-MPO	1	0.589368	1.88756e-155
MPST	Clu-MPO	0.357	0.679063	1.29399e-153
RPS24	Clu-MPO	0.996	0.748961	1.93913e-153
RPS9	Clu-MPO	1	0.653951	9.43471e-153
RPS3	Clu-MPO	1	0.578617	9.01178e-151
AC002454.1	Clu-MPO	0.167	0.549538	1.06857e-150
IMPDH2	Clu-MPO	0.455	0.779276	2.49433e-150
RPS18	Clu-MPO	1	0.548326	4.33842e-150
CDT1	Clu-MPO	0.154	0.462464	8.84369e-150
EEF1B2	Clu-MPO	0.949	0.881267	5.92616e-149
AIF1	Clu-MPO	0.806	0.520834	1.96297e-148
SPARC	Clu-MPO	0.256	0.496534	8.04732e-148
TM7SF3	Clu-MPO	0.258	0.55807	1.11988e-145
LTC4S	Clu-MPO	0.133	0.454068	3.95698e-144
TKT	Clu-MPO	0.643	0.795125	7.75868e-144
VAMP5	Clu-MPO	0.649	0.823211	1.79378e-143
LSM2	Clu-MPO	0.48	0.771764	9.19808e-143
TMSB4X	Clu-MPO	1	-0.758344	1.20746e-142
GTSF1	Clu-MPO	0.241	0.568517	2.34191e-140
TALDO1	Clu-MPO	0.723	0.768509	5.30038e-134
FAH	Clu-MPO	0.207	0.542419	1.95647e-133
MYB	Clu-MPO	0.139	0.426514	3.6848e-133
TYMS	Clu-MPO	0.22	0.707814	2.21987e-132
RPS5	Clu-MPO	0.994	0.683257	3.95007e-132
APEX1	Clu-MPO	0.499	0.832183	2.3444e-131
VIM	Clu-MPO	0.858	1.07096	4.73065e-131
RPL7A	Clu-MPO	0.983	0.78249	5.40347e-130
DUT	Clu-MPO	0.624	0.905403	4.6799e-129
PCBD1	Clu-MPO	0.26	0.601817	1.2471e-127
MYL6B	Clu-MPO	0.213	0.533882	1.73448e-125
NFE2	Clu-MPO	0.283	0.577774	3.33202e-125
TMEM173	Clu-MPO	0.361	0.60274	5.48131e-124
IL18	Clu-MPO	0.157	0.450779	9.10257e-124
NME1	Clu-MPO	0.359	0.680068	2.48813e-122
RPL29	Clu-MPO	0.987	0.596781	6.00776e-122
ENO1	Clu-MPO	0.831	0.847678	9.24622e-122
COMT	Clu-MPO	0.404	0.669852	2.73407e-121
ATP5G2	Clu-MPO	0.966	0.764341	4.85168e-121
RAB34	Clu-MPO	0.194	0.478608	1.4099e-119
RPL10A	Clu-MPO	0.991	0.58811	1.63448e-119
SNRPD1	Clu-MPO	0.545	0.70488	4.74409e-115
MGST1	Clu-MPO	0.283	0.723958	4.92845e-115
GSTP1	Clu-MPO	0.886	0.843876	3.98223e-114
EGFL7	Clu-MPO	0.188	0.484166	1.69125e-113
HINT1	Clu-MPO	0.915	0.740133	1.73773e-113
H2AFY	Clu-MPO	0.6	0.769293	2.10742e-113
ST3GAL6	Clu-MPO	0.112	0.314201	2.24175e-112
PEBP1	Clu-MPO	0.622	0.741403	5.77469e-112
NIT2	Clu-MPO	0.233	0.475969	6.72216e-112
BTF3	Clu-MPO	0.966	0.703871	8.02817e-112
RPS27	Clu-MPO	0.996	-0.805208	1.66432e-111
C1QBP	Clu-MPO	0.632	0.784299	2.31302e-111
HLA-A	Clu-MPO	0.738	-1.25485	4.89474e-111
RPLP0	Clu-MPO	0.972	0.688098	9.89602e-111
HOXA10	Clu-MPO	0.176	0.495004	2.02081e-110
CDK4	Clu-MPO	0.281	0.619646	4.26128e-110
GNB2L1	Clu-MPO	0.987	0.623917	4.65385e-110
PXMP2	Clu-MPO	0.171	0.46497	8.17503e-109
CKS2	Clu-MPO	0.245	0.552856	1.30638e-107
IL32	Clu-MPO	0.021	-2.78483	1.38802e-107
PSMB5	Clu-MPO	0.347	0.543979	4.62254e-107
NUDT1	Clu-MPO	0.342	0.558846	1.86939e-106
KCNAB2	Clu-MPO	0.252	0.483462	2.00699e-106
GSN	Clu-MPO	0.273	0.624157	6.68353e-105
HSBP1	Clu-MPO	0.472	0.715745	4.1437e-104
MPG	Clu-MPO	0.368	0.591634	4.12925e-103
RPL13	Clu-MPO	1	0.436636	1.64391e-102
IRF2BP2	Clu-MPO	0.283	0.663614	2.4113e-102
PRDX5	Clu-MPO	0.687	0.738598	3.51893e-102
RPS23	Clu-MPO	0.996	0.519147	1.03775e-101
ESYT2	Clu-MPO	0.154	0.402993	1.44824e-99
PRSS21	Clu-MPO	0.125	0.337064	3.53654e-99
RUNX1	Clu-MPO	0.199	0.479522	3.65424e-99
MRP63	Clu-MPO	0.531	0.626902	2.87505e-98
HNRNPA1	Clu-MPO	0.941	0.726635	4.06096e-98
HSP90AB1	Clu-MPO	0.706	0.718577	1.5819e-97
SYNGR1	Clu-MPO	0.33	0.458936	1.69798e-97
SPINT2	Clu-MPO	0.374	0.585172	1.88582e-97
CLTA	Clu-MPO	0.507	0.596415	2.37422e-96
LYL1	Clu-MPO	0.349	0.649153	9.9033e-96
EIF4EBP1	Clu-MPO	0.343	0.625786	8.44848e-95
NPM1	Clu-MPO	0.935	0.684272	5.67183e-93
SNHG7	Clu-MPO	0.419	0.631343	1.09405e-92
TUBB6	Clu-MPO	0.127	0.326271	1.59202e-92
GAMT	Clu-MPO	0.199	0.533937	1.8743e-92
C9orf139	Clu-MPO	0.123	0.347519	5.60116e-92
CD34	Clu-MPO	0.169	0.540365	7.23027e-92
EIF4A1	Clu-MPO	0.894	0.686494	7.7311e-92
EAF2	Clu-MPO	0.262	0.372092	9.93194e-92
ARL2	Clu-MPO	0.361	0.596124	1.94627e-91
FAM212A	Clu-MPO	0.142	0.394358	2.64304e-91
PABPN1	Clu-MPO	0.304	0.612643	9.89879e-91
PTPLA	Clu-MPO	0.144	0.419189	1.58178e-90
RPL22L1	Clu-MPO	0.347	0.575613	1.81202e-90
PYCARD	Clu-MPO	0.643	0.634076	5.6896e-90
RNASEH2B	Clu-MPO	0.372	0.539104	5.40381e-89
NDUFC2	Clu-MPO	0.641	0.652046	2.64287e-88
NDUFB9	Clu-MPO	0.649	0.657824	6.96628e-88
RPL28	Clu-MPO	1	0.451297	3.55866e-87
GGH	Clu-MPO	0.146	0.363447	5.4734e-87
SPNS3	Clu-MPO	0.18	0.442791	8.676e-87
RPL15	Clu-MPO	0.998	0.421744	4.97812e-86
SLC25A3	Clu-MPO	0.691	0.62687	1.22335e-85
CD33	Clu-MPO	0.194	0.474769	1.30636e-85
C16orf74	Clu-MPO	0.159	0.358229	5.71549e-85
GGCT	Clu-MPO	0.273	0.483708	5.8548e-85
ACTG1	Clu-MPO	0.92	0.608451	7.16837e-85
MGST2	Clu-MPO	0.216	0.461931	8.18451e-85
HSH2D	Clu-MPO	0.178	0.380245	1.48203e-84
SNHG8	Clu-MPO	0.474	0.535387	2.48508e-84
RPS7	Clu-MPO	0.994	0.458994	3.49092e-84
GPX1	Clu-MPO	0.801	0.489684	6.44571e-84
MRPL23	Clu-MPO	0.552	0.561874	2.11227e-83
SHFM1	Clu-MPO	0.535	0.543747	2.31783e-83
MBOAT7	Clu-MPO	0.203	0.425277	8.32696e-83
RGL4	Clu-MPO	0.233	0.460448	1.04782e-82
NASP	Clu-MPO	0.269	0.531762	2.97535e-82
CD99	Clu-MPO	0.772	0.640762	6.13347e-82
MSRB2	Clu-MPO	0.203	0.487651	9.02476e-82
CENPW	Clu-MPO	0.137	0.424523	8.957e-81
PLIN3	Clu-MPO	0.224	0.454186	9.20983e-81
TXN	Clu-MPO	0.554	0.60388	5.10996e-80
LDHB	Clu-MPO	0.909	0.627659	1.13243e-79
MRPL51	Clu-MPO	0.455	0.624425	1.3814e-78
FBXW9	Clu-MPO	0.108	0.306269	1.86817e-78
TNFRSF1A	Clu-MPO	0.254	0.46902	2.63587e-78
FSCN1	Clu-MPO	0.101	0.283267	5.00303e-78
SLC25A5	Clu-MPO	0.687	0.635643	1.62488e-77
NGFRAP1	Clu-MPO	0.323	0.496494	2.20592e-77
HSD17B11	Clu-MPO	0.548	0.550003	2.75541e-77
NUDT5	Clu-MPO	0.3	0.499633	4.15752e-77
MYADM	Clu-MPO	0.182	0.355953	5.17805e-77
GSTO1	Clu-MPO	0.556	0.513875	5.68601e-77
BZW2	Clu-MPO	0.26	0.444445	9.08935e-77
HEBP1	Clu-MPO	0.23	0.54342	1.68118e-76
H2AFZ	Clu-MPO	0.723	0.896476	1.41306e-75
MRPL12	Clu-MPO	0.25	0.487062	2.97001e-75
GPI	Clu-MPO	0.243	0.459462	1.01168e-74
RPL13A	Clu-MPO	1	0.379272	2.85845e-73
MAT2A	Clu-MPO	0.173	0.434509	3.84178e-73
C6orf48	Clu-MPO	0.592	0.583931	4.77669e-73
NREP	Clu-MPO	0.101	0.302278	6.71821e-73
HLA-E	Clu-MPO	0.233	-1.63023	7.01447e-73
RPS8	Clu-MPO	0.996	0.398935	1.57572e-72
DNAJC1	Clu-MPO	0.25	0.431399	2.72559e-72
AHCY	Clu-MPO	0.175	0.450173	1.01902e-71
MIF	Clu-MPO	0.653	0.603758	1.09695e-71
SOX4	Clu-MPO	0.171	0.445568	1.32553e-71
ZFAS1	Clu-MPO	0.676	0.608831	1.94106e-71
TMEM14C	Clu-MPO	0.345	0.549479	2.64282e-71
HIST1H2BK	Clu-MPO	0.307	0.530123	4.87316e-71
LTB	Clu-MPO	0.025	-2.45325	3.03646e-70
ACTB	Clu-MPO	0.968	-0.803547	1.03884e-69
NUP214	Clu-MPO	0.25	0.481329	1.85822e-69
LENG8	Clu-MPO	0.178	0.362476	2.17862e-69
RANBP1	Clu-MPO	0.59	0.583654	5.9056e-69
RNF130	Clu-MPO	0.362	0.436642	8.19445e-69
UQCRH	Clu-MPO	0.795	0.57835	3.85989e-68
ADA	Clu-MPO	0.249	0.428132	5.23813e-68
NIPSNAP3A	Clu-MPO	0.228	0.464919	8.13092e-68
MDK	Clu-MPO	0.129	0.332175	1.92081e-67
CTC-524C5.2	Clu-MPO	0.192	0.355269	2.29232e-67
SRM	Clu-MPO	0.201	0.419533	3.93567e-67
NME4	Clu-MPO	0.3	0.483065	4.76012e-67
PTRHD1	Clu-MPO	0.342	0.499034	1.0174e-66
TIMM13	Clu-MPO	0.431	0.4991	1.44201e-66
HMGN3	Clu-MPO	0.562	0.46598	1.81871e-66
LMO2	Clu-MPO	0.114	0.276506	2.17984e-66
MFSD10	Clu-MPO	0.279	0.42723	3.2067e-66
RPL6	Clu-MPO	0.992	0.411125	6.8505e-66
ANXA1	Clu-MPO	0.848	0.636529	2.76282e-65
TUBA1C	Clu-MPO	0.176	0.389406	2.7751e-65
PPIA	Clu-MPO	0.822	0.558166	3.29189e-65
RUVBL2	Clu-MPO	0.205	0.39657	4.67755e-65
CKS1B	Clu-MPO	0.195	0.462299	5.47545e-65
SULT1A1	Clu-MPO	0.239	0.473437	8.34467e-65
NAPRT1	Clu-MPO	0.235	0.42541	1.14675e-64
NAP1L1	Clu-MPO	0.698	0.510496	2.70558e-64
NACA	Clu-MPO	0.953	0.463128	3.4439e-64
IFITM3	Clu-MPO	0.533	0.277878	7.68762e-64
CTSD	Clu-MPO	0.469	0.439924	1.98482e-63
FES	Clu-MPO	0.161	0.379423	2.00965e-63
RPS15	Clu-MPO	1	0.365258	1.37231e-62
TRAPPC6A	Clu-MPO	0.446	0.420844	1.38252e-62
ORAI3	Clu-MPO	0.18	0.447263	1.51097e-62
PDCD4-AS1	Clu-MPO	0.112	0.271972	7.386e-62
RILPL2	Clu-MPO	0.273	0.45686	8.11963e-62
YWHAE	Clu-MPO	0.283	0.429992	8.13902e-62
VKORC1	Clu-MPO	0.258	0.395512	1.65006e-61
TPGS1	Clu-MPO	0.235	0.448798	1.86621e-61
CD38	Clu-MPO	0.123	0.31079	1.99994e-61
PGD	Clu-MPO	0.237	0.420797	3.28098e-61
C16orf13	Clu-MPO	0.397	0.378238	3.86371e-61
MT-ND1	Clu-MPO	0.947	0.514481	4.60016e-61
RPL10	Clu-MPO	1	0.313295	4.80648e-61
TMSB10	Clu-MPO	0.987	-0.414717	4.98877e-61
FAM26F	Clu-MPO	0.304	0.414468	5.02512e-61
NBEAL1	Clu-MPO	0.628	0.476919	7.71311e-61
RPL18A	Clu-MPO	1	0.360718	1.53006e-60
NCF4	Clu-MPO	0.23	0.440534	1.75467e-60
RPL11	Clu-MPO	1	0.330104	1.94073e-60
HMGN1	Clu-MPO	0.75	0.498059	1.99957e-60
CD63	Clu-MPO	0.689	0.423902	2.72998e-60
C9orf89	Clu-MPO	0.266	0.380952	4.33145e-60
PRDX6	Clu-MPO	0.55	0.5118	1.04778e-59
TMEM261	Clu-MPO	0.296	0.406265	1.51476e-59
PSMB7	Clu-MPO	0.457	0.487561	2.10544e-59
RPL19	Clu-MPO	0.994	0.341719	5.14357e-59
AKR7A2	Clu-MPO	0.279	0.344137	1.02345e-58
HAUS4	Clu-MPO	0.14	0.314352	1.99289e-58
AK2	Clu-MPO	0.228	0.425906	3.18577e-58
TMCO3	Clu-MPO	0.118	0.300091	3.54471e-58
TPI1	Clu-MPO	0.742	0.520427	3.61458e-58
CHCHD2	Clu-MPO	0.888	0.558358	8.07323e-58
IMPA2	Clu-MPO	0.101	0.285053	9.00845e-58
LARP1	Clu-MPO	0.152	0.354507	9.94558e-58
TK1	Clu-MPO	0.11	0.373445	2.02434e-57
TCEAL1	Clu-MPO	0.144	0.300721	7.37539e-57
BTG1	Clu-MPO	0.19	-1.56459	1.02883e-56
PLAC8	Clu-MPO	0.607	0.40116	1.44013e-56
RPS11	Clu-MPO	0.972	0.472074	1.66573e-56
MGMT	Clu-MPO	0.287	0.383473	1.69793e-56
SERPINB6	Clu-MPO	0.304	0.399508	2.2525e-56
ACTN1	Clu-MPO	0.201	0.362446	3.08604e-56
BST2	Clu-MPO	0.535	0.411847	3.31144e-56
CLEC12A	Clu-MPO	0.173	0.322634	4.18568e-56
GADD45GIP1	Clu-MPO	0.503	0.461023	8.28782e-56
COX7A2L	Clu-MPO	0.641	0.407993	1.07215e-55
C20orf24	Clu-MPO	0.421	0.383752	1.72785e-55
IL6R	Clu-MPO	0.123	0.299492	2.83781e-55
MRPS33	Clu-MPO	0.233	0.344485	6.99246e-55
GMPR2	Clu-MPO	0.19	0.35151	1.00219e-54
STOML2	Clu-MPO	0.306	0.44914	1.13442e-54
TCEAL4	Clu-MPO	0.171	0.35098	1.16133e-54
H2AFV	Clu-MPO	0.417	0.407864	3.69161e-54
AGPAT2	Clu-MPO	0.182	0.310365	6.8241e-54
MGST3	Clu-MPO	0.421	0.437319	8.5706e-54
UQCC2	Clu-MPO	0.237	0.410171	3.48203e-53
C19orf48	Clu-MPO	0.175	0.471524	5.70926e-53
PRKCSH	Clu-MPO	0.243	0.376119	8.71611e-53
PRDX3	Clu-MPO	0.357	0.423343	3.44261e-52
ATP5G3	Clu-MPO	0.573	0.516876	6.01781e-52
RPL24	Clu-MPO	0.975	0.418738	7.25909e-52
ALDOA	Clu-MPO	0.696	0.499284	7.46257e-52
LAIR1	Clu-MPO	0.173	0.331173	1.05678e-51
KDELR1	Clu-MPO	0.213	0.346046	1.07371e-51
AGTRAP	Clu-MPO	0.29	0.452369	1.10953e-51
ETHE1	Clu-MPO	0.275	0.340664	1.44133e-51
CLNS1A	Clu-MPO	0.372	0.379033	2.01885e-51
TUBB	Clu-MPO	0.524	0.535636	2.31102e-51
ANP32B	Clu-MPO	0.512	0.518535	2.90853e-51
KHSRP	Clu-MPO	0.121	0.258864	3.49974e-51
GNLY	Clu-MPO	0.017	-3.32294	5.53303e-51
PAICS	Clu-MPO	0.142	0.438111	6.24224e-51
LAGE3	Clu-MPO	0.3	0.445535	1.74659e-50
MLEC	Clu-MPO	0.195	0.334615	1.87082e-50
RPL3	Clu-MPO	0.998	0.29732	1.91967e-50
ATP5G1	Clu-MPO	0.414	0.394729	7.22231e-50
RPS14	Clu-MPO	1	0.308335	1.27281e-49
RAN	Clu-MPO	0.651	0.540138	1.28675e-49
MZT2B	Clu-MPO	0.503	0.391195	2.43276e-49
WDR83OS	Clu-MPO	0.611	0.400845	3.05272e-49
ISOC2	Clu-MPO	0.175	0.29073	3.19509e-49
COX5A	Clu-MPO	0.522	0.457655	8.16886e-49
RP11-304L19.5	Clu-MPO	0.114	0.275493	8.45141e-49
NME1-NME2	Clu-MPO	0.123	0.254176	3.33769e-48
QARS	Clu-MPO	0.239	0.283132	3.58624e-48
RNF220	Clu-MPO	0.121	0.270502	3.67984e-48
DHRS4	Clu-MPO	0.167	0.306666	5.27097e-48
ILF2	Clu-MPO	0.372	0.400803	6.11942e-48
CHD4	Clu-MPO	0.163	0.337573	7.10739e-48
RPL14	Clu-MPO	0.987	0.341946	7.87753e-48
MRPL18	Clu-MPO	0.345	0.364274	8.73046e-48
APP	Clu-MPO	0.152	0.31967	9.03958e-48
ACTN4	Clu-MPO	0.194	0.356231	1.15367e-47
NHP2	Clu-MPO	0.417	0.379414	1.33444e-47
GPX4	Clu-MPO	0.683	0.424319	1.70555e-47
SPI1	Clu-MPO	0.345	0.291933	1.98619e-47
NDUFS3	Clu-MPO	0.294	0.386794	2.64533e-47
SDCCAG8	Clu-MPO	0.157	0.476673	3.62576e-47
ETFB	Clu-MPO	0.359	0.357795	6.39607e-47
RPS3A	Clu-MPO	0.992	0.392383	6.58935e-47
SPTLC2	Clu-MPO	0.137	0.298871	7.01905e-47
PSMG1	Clu-MPO	0.161	0.298243	9.66948e-47
PHPT1	Clu-MPO	0.416	0.381617	1.49135e-46
BANF1	Clu-MPO	0.37	0.358662	1.55824e-46
DYNLL1	Clu-MPO	0.63	0.353058	2.00363e-46
NENF	Clu-MPO	0.296	0.333976	2.32511e-46
MDH2	Clu-MPO	0.429	0.408445	2.85241e-46
IDH1	Clu-MPO	0.116	0.264493	3.51681e-46
CCDC28B	Clu-MPO	0.175	0.288957	3.78521e-46
EIF3A	Clu-MPO	0.22	0.321129	3.81554e-46
PTPRCAP	Clu-MPO	0.239	-1.47477	3.98198e-46
RPL26	Clu-MPO	1	0.304962	5.80149e-46
FAM195A	Clu-MPO	0.186	0.367735	2.06999e-45
CD3E	Clu-MPO	0.004	-1.68659	2.57795e-45
SMS	Clu-MPO	0.296	0.326214	3.09848e-45
LAT2	Clu-MPO	0.23	0.306726	3.30548e-45
MDH1	Clu-MPO	0.436	0.448422	3.3342e-45
FIBP	Clu-MPO	0.328	0.374248	4.51679e-45
ZNF22	Clu-MPO	0.254	0.331439	5.5784e-45
FAM45A	Clu-MPO	0.209	0.33384	6.31465e-45
LSM7	Clu-MPO	0.586	0.412428	7.47771e-45
LGALS9	Clu-MPO	0.277	0.410544	7.78997e-45
CASP6	Clu-MPO	0.131	0.291082	8.39084e-45
MTIF3	Clu-MPO	0.254	0.344801	1.26596e-44
MIF4GD	Clu-MPO	0.213	0.263335	1.52337e-44
TMEM219	Clu-MPO	0.427	0.353461	1.54707e-44
EIF3M	Clu-MPO	0.554	0.419506	1.56455e-44
ATP5A1	Clu-MPO	0.609	0.410847	1.88861e-44
EEF1A1	Clu-MPO	0.964	0.379846	2.12532e-44
GAPT	Clu-MPO	0.15	0.275241	2.3046e-44
CUEDC2	Clu-MPO	0.235	0.319793	3.17732e-44
C11orf31	Clu-MPO	0.583	0.392089	4.58566e-44
NMI	Clu-MPO	0.296	0.434548	4.63986e-44
TRIM28	Clu-MPO	0.114	0.275004	6.12312e-44
AC093673.5	Clu-MPO	0.131	0.278612	8.30722e-44
RPL35	Clu-MPO	1	0.322804	1.20587e-43
ZFP36L2	Clu-MPO	0.666	0.424865	1.24532e-43
NDUFB11	Clu-MPO	0.685	0.418094	1.63845e-43
RNASEH2A	Clu-MPO	0.127	0.281987	3.48524e-43
OLA1	Clu-MPO	0.252	0.304543	4.11579e-43
DARS	Clu-MPO	0.224	0.257992	4.97823e-43
PTPMT1	Clu-MPO	0.264	0.26227	5.05844e-43
WDR61	Clu-MPO	0.256	0.324911	7.55787e-43
KIAA0125	Clu-MPO	0.194	0.270088	1.10973e-42
GRHPR	Clu-MPO	0.197	0.32565	1.32958e-42
GLUL	Clu-MPO	0.281	0.489777	1.58792e-42
OSTC	Clu-MPO	0.395	0.38816	1.6006e-42
TRMT1	Clu-MPO	0.203	0.34945	1.72567e-42
ERGIC3	Clu-MPO	0.353	0.307899	1.79662e-42
ATP5B	Clu-MPO	0.531	0.405382	2.01323e-42
MRPL11	Clu-MPO	0.269	0.327115	2.28192e-42
RCC2	Clu-MPO	0.11	0.278332	2.89915e-42
RPL22	Clu-MPO	0.882	0.423892	3.15979e-42
AAMDC	Clu-MPO	0.125	0.304137	3.79981e-42
CCT8	Clu-MPO	0.452	0.372828	4.73338e-42
SMC4	Clu-MPO	0.182	0.316502	7.28197e-42
ADRBK1	Clu-MPO	0.15	0.285882	1.39198e-41
TXN2	Clu-MPO	0.287	0.398402	2.29557e-41
HSPD1	Clu-MPO	0.281	0.385378	2.34712e-41
SNRPD3	Clu-MPO	0.357	0.305119	2.4196e-41
MRPL32	Clu-MPO	0.211	0.313486	2.58375e-41
ANAPC11	Clu-MPO	0.423	0.391762	3.25131e-41
GZMA	Clu-MPO	0.004	-2.12578	4.49218e-41
HOXA9	Clu-MPO	0.106	0.339587	4.74019e-41
ZNF593	Clu-MPO	0.157	0.278628	6.7306e-41
MEST	Clu-MPO	0.11	0.252571	7.40682e-41
CRYL1	Clu-MPO	0.125	0.261428	8.88539e-41
RPS10	Clu-MPO	0.991	0.377168	1.30032e-40
DDT	Clu-MPO	0.414	0.385065	1.53552e-40
CUTA	Clu-MPO	0.628	0.325055	2.19349e-40
RPN1	Clu-MPO	0.231	0.317053	2.83805e-40
PPA1	Clu-MPO	0.427	0.336801	5.05455e-40
FARSA	Clu-MPO	0.163	0.273538	6.33519e-40
RPS29	Clu-MPO	0.888	-0.668649	9.60953e-40
RPS12	Clu-MPO	1	0.266737	1.04612e-39
CCT2	Clu-MPO	0.271	0.312464	1.04788e-39
LSMD1	Clu-MPO	0.436	0.354845	1.36623e-39
SLC39A4	Clu-MPO	0.135	0.289303	1.84213e-39
RPL18	Clu-MPO	0.994	0.313394	1.94328e-39
MAZ	Clu-MPO	0.15	0.325379	1.98901e-39
RPL21	Clu-MPO	0.992	-0.391399	2.63961e-39
EIF3B	Clu-MPO	0.108	0.291719	2.84005e-39
ATP6V1F	Clu-MPO	0.575	0.379637	3.2744e-39
AP2S1	Clu-MPO	0.507	0.390716	4.17675e-39
SET	Clu-MPO	0.23	0.281294	4.92688e-39
TOMM22	Clu-MPO	0.361	0.374881	6.79726e-39
TPT1	Clu-MPO	0.979	0.331813	6.98089e-39
BEX4	Clu-MPO	0.239	0.348326	8.69742e-39
CSNK2B	Clu-MPO	0.406	0.32412	1.2855e-38
ATP5D	Clu-MPO	0.681	0.361696	1.39703e-38
SMIM20	Clu-MPO	0.195	0.277935	1.5737e-38
PGLS	Clu-MPO	0.378	0.337691	1.94874e-38
MZT2A	Clu-MPO	0.421	0.311769	4.83114e-38
ARRDC1	Clu-MPO	0.194	0.428932	9.66847e-38
ZNHIT1	Clu-MPO	0.431	0.250763	1.03263e-37
YBX3	Clu-MPO	0.355	0.519789	1.30612e-37
RPL9	Clu-MPO	0.987	0.288109	1.56544e-37
LGALS3BP	Clu-MPO	0.167	0.306045	2.24706e-37
HNRNPC	Clu-MPO	0.444	0.314078	4.17459e-37
SF3B5	Clu-MPO	0.51	0.377233	4.33011e-37
UFC1	Clu-MPO	0.452	0.353387	6.06116e-37
RPS19	Clu-MPO	1	0.306473	8.57084e-37
DCTPP1	Clu-MPO	0.194	0.313698	8.7474e-37
PPIH	Clu-MPO	0.169	0.261164	8.7703e-37
GIMAP7	Clu-MPO	0.017	-1.42754	1.92067e-36
NDUFS4	Clu-MPO	0.273	0.27493	3.56406e-36
NDUFB5	Clu-MPO	0.366	0.325067	4.48735e-36
C20orf27	Clu-MPO	0.281	0.289562	5.16897e-36
RPS20	Clu-MPO	0.987	0.316084	6.87487e-36
FBL	Clu-MPO	0.389	0.297839	7.66185e-36
RFXANK	Clu-MPO	0.209	0.319832	1.33298e-35
NDUFS8	Clu-MPO	0.383	0.4256	1.8072e-35
SRSF3	Clu-MPO	0.56	0.310332	2.63744e-35
RPL37A	Clu-MPO	0.981	0.32665	5.41273e-35
UQCRFS1	Clu-MPO	0.421	0.372633	7.2389e-35
MTDH	Clu-MPO	0.404	0.353821	7.39851e-35
MAPKAPK3	Clu-MPO	0.171	0.261152	7.7911e-35
GZMH	Clu-MPO	0.008	-2.10816	8.97883e-35
ALKBH7	Clu-MPO	0.307	0.312028	1.10249e-34
PAFAH1B3	Clu-MPO	0.163	0.269557	1.40964e-34
YBX1	Clu-MPO	0.896	0.421951	2.26333e-34
TUFM	Clu-MPO	0.429	0.309398	4.0937e-34
NOB1	Clu-MPO	0.161	0.459773	6.37497e-34
GPN3	Clu-MPO	0.161	0.260762	7.44713e-34
PTMA	Clu-MPO	0.998	0.294033	9.49862e-34
LCK	Clu-MPO	0.006	-1.40787	1.78038e-33
GNA15	Clu-MPO	0.116	0.358948	1.82158e-33
ABRACL	Clu-MPO	0.4	0.305149	1.85507e-33
C1orf86	Clu-MPO	0.349	0.275468	2.82452e-33
NDUFV1	Clu-MPO	0.231	0.322549	3.73751e-33
RPL8	Clu-MPO	0.996	0.260842	5.00804e-33
COMMD3	Clu-MPO	0.262	0.252543	5.68765e-33
EIF1AX	Clu-MPO	0.235	0.251617	7.34164e-33
SERP1	Clu-MPO	0.605	0.336322	7.45757e-33
ACADVL	Clu-MPO	0.243	0.265474	9.43174e-33
TACC3	Clu-MPO	0.146	0.273257	1.11441e-32
RNASEH2C	Clu-MPO	0.321	0.3184	1.58391e-32
ATP5C1	Clu-MPO	0.406	0.402317	2.72193e-32
PADI4	Clu-MPO	0.106	0.32167	2.95451e-32
DNAJC2	Clu-MPO	0.171	0.261532	3.33752e-32
CMTM7	Clu-MPO	0.252	0.371911	3.40137e-32
SNRPE	Clu-MPO	0.353	0.308318	6.74721e-32
VDAC2	Clu-MPO	0.362	0.287862	9.76183e-32
PKM	Clu-MPO	0.575	0.30791	1.7511e-31
NUCKS1	Clu-MPO	0.256	0.33385	2.34488e-31
MCM5	Clu-MPO	0.123	0.294141	2.61613e-31
CD3D	Clu-MPO	0.195	-1.50437	5.27505e-31
GZMB	Clu-MPO	0.008	-2.10594	6.42042e-31
PFDN2	Clu-MPO	0.323	0.256597	8.71387e-31
NSMCE1	Clu-MPO	0.258	0.285503	9.55108e-31
ITM2B	Clu-MPO	0.421	-0.942015	1.14889e-30
FGFBP2	Clu-MPO	0.004	-2.00397	1.2789e-30
CALM1	Clu-MPO	0.214	-1.17421	1.46381e-30
EIF3H	Clu-MPO	0.584	0.409055	1.62506e-30
RPL5	Clu-MPO	0.958	0.294929	1.63942e-30
CCNI	Clu-MPO	0.598	0.279118	2.7404e-30
ATP6AP1	Clu-MPO	0.192	0.397709	5.83351e-30
PSENEN	Clu-MPO	0.292	0.262027	9.21021e-30
PSMA7	Clu-MPO	0.658	0.304501	9.64648e-30
KHDRBS1	Clu-MPO	0.317	0.326058	9.95964e-30
PTK2B	Clu-MPO	0.121	0.277335	1.80566e-29
TSPO	Clu-MPO	0.636	0.2628	2.18833e-29
SYK	Clu-MPO	0.121	0.269684	2.9163e-29
PARVB	Clu-MPO	0.137	0.263812	7.55872e-29
ATOX1	Clu-MPO	0.273	0.304746	8.44938e-29
SCAND1	Clu-MPO	0.476	0.361101	9.3206e-29
C7orf55	Clu-MPO	0.15	0.281821	1.17297e-28
ENY2	Clu-MPO	0.359	0.278166	1.47398e-28
HCST	Clu-MPO	0.837	0.295067	1.5344e-28
LAMTOR2	Clu-MPO	0.361	0.264909	1.65666e-28
HSP90AA1	Clu-MPO	0.571	0.282237	2.03129e-28
CD2	Clu-MPO	0.008	-1.3609	3.27151e-28
C1orf43	Clu-MPO	0.266	0.325553	4.08724e-28
ESD	Clu-MPO	0.25	0.277338	4.46055e-28
MRPL27	Clu-MPO	0.197	0.271082	1.3742e-27
MYL12A	Clu-MPO	0.672	-0.785009	1.38217e-27
UBA7	Clu-MPO	0.108	0.27589	2.19994e-27
ARF1	Clu-MPO	0.529	0.284698	3.42538e-27
ECHS1	Clu-MPO	0.205	0.293349	4.33715e-27
POLR1D	Clu-MPO	0.328	0.254022	4.78934e-27
ATP5J	Clu-MPO	0.55	0.261786	9.23084e-27
TMEM101	Clu-MPO	0.135	0.279635	1.96713e-26
PARVG	Clu-MPO	0.207	0.250663	2.55096e-26
RPL36	Clu-MPO	1	0.254841	2.85331e-26
CD44	Clu-MPO	0.423	0.322375	5.09285e-26
PFDN5	Clu-MPO	0.968	0.271693	6.13698e-26
CHCHD5	Clu-MPO	0.239	0.268541	7.77976e-26
IKBIP	Clu-MPO	0.135	0.276156	9.51424e-26
BAX	Clu-MPO	0.387	0.329852	1.18504e-25
EIF3L	Clu-MPO	0.628	0.297977	2.07863e-25
GZMM	Clu-MPO	0	-1.34112	2.44762e-25
OXLD1	Clu-MPO	0.194	0.265352	3.07923e-25
PSMB2	Clu-MPO	0.338	0.259871	3.17121e-25
CREG1	Clu-MPO	0.201	0.305636	4.7794e-25
PMVK	Clu-MPO	0.188	0.259615	6.38556e-25
NDUFA11	Clu-MPO	0.584	0.262389	1.59266e-24
RPSA	Clu-MPO	0.958	0.28924	3.08117e-24
GAR1	Clu-MPO	0.114	0.25546	3.99135e-24
PARK7	Clu-MPO	0.594	0.258295	4.43617e-24
UBC	Clu-MPO	0.501	-0.763809	5.45438e-24
PTPRC	Clu-MPO	0.072	-1.14969	7.04969e-24
CD302	Clu-MPO	0.131	0.277685	8.53592e-24
SYPL1	Clu-MPO	0.262	0.341563	1.32458e-23
CXCR4	Clu-MPO	0.047	-1.32128	1.41656e-23
CAPG	Clu-MPO	0.237	0.250845	1.66698e-23
RPL34	Clu-MPO	0.945	-0.485623	1.73256e-23
LSM4	Clu-MPO	0.315	0.306826	1.89161e-23
METTL9	Clu-MPO	0.351	0.411172	2.44771e-23
EMP3	Clu-MPO	0.436	-0.868411	2.45483e-23
BRK1	Clu-MPO	0.605	0.264713	3.47468e-23
CD7	Clu-MPO	0.011	-1.20182	6.43156e-23
CPNE1	Clu-MPO	0.226	0.32664	7.05808e-23
CHID1	Clu-MPO	0.14	0.253125	7.86469e-23
ATP5E	Clu-MPO	0.731	-0.594588	8.28464e-23
ISG20	Clu-MPO	0.061	-1.18885	9.50984e-23
LYRM4	Clu-MPO	0.176	0.251592	1.63184e-22
PRF1	Clu-MPO	0.021	-1.5555	2.78857e-22
RPL23	Clu-MPO	0.877	0.288589	4.81797e-22
MT-CO1	Clu-MPO	0.958	-0.29665	5.60533e-22
RPL7	Clu-MPO	0.996	0.270501	6.56174e-22
PNKD	Clu-MPO	0.273	1.35662	8.95097e-22
GIMAP4	Clu-MPO	0.006	-1.11954	1.54998e-21
HLA-DRA	Clu-MPO	0.742	-0.474622	1.7897e-21
IGBP1	Clu-MPO	0.264	0.300404	3.55471e-21
S100A6	Clu-MPO	0.721	-0.867294	4.18205e-21
SUCLG1	Clu-MPO	0.222	0.326503	1.68817e-20
CORO1A	Clu-MPO	0.526	-0.816584	1.83277e-20
PTTG1	Clu-MPO	0.146	0.325803	2.66859e-20
HIST1H4C	Clu-MPO	0.146	0.262115	6.97476e-20
RNF7	Clu-MPO	0.321	0.264944	8.84887e-20
IFITM1	Clu-MPO	0.07	-1.14955	1.0208e-19
KIF22	Clu-MPO	0.139	0.250288	1.19635e-19
SAP18	Clu-MPO	0.63	0.258533	3.2569e-19
TFPT	Clu-MPO	0.129	0.264101	3.33533e-19
GMFG	Clu-MPO	0.818	0.774832	1.64909e-18
EVL	Clu-MPO	0.144	-1.06187	4.81034e-18
IFITM2	Clu-MPO	0.454	-1.03369	5.07731e-18
EEF2	Clu-MPO	0.82	0.276295	1.05388e-16
COA3	Clu-MPO	0.195	0.261627	4.65966e-16
TMEM66	Clu-MPO	0.416	-0.868702	2.35455e-15
LAT	Clu-MPO	0.002	-0.949912	5.63069e-15
JUNB	Clu-MPO	0.139	-1.03495	6.79313e-15
FTH1	Clu-MPO	0.949	-0.635514	9.19214e-15
S100A4	Clu-MPO	0.848	-0.801871	2.37979e-14
GIMAP5	Clu-MPO	0.009	-0.890791	2.76779e-14
ANXA5	Clu-MPO	0.004	-0.81267	3.67767e-14
TYROBP	Clu-MPO	0.679	-0.436486	5.02968e-14
MT-CO2	Clu-MPO	0.958	-0.264764	5.07874e-14
PNPLA2	Clu-MPO	0.108	0.28442	9.5775e-14
DOK2	Clu-MPO	0.025	-0.922618	1.11426e-13
TXNIP	Clu-MPO	0.326	-0.87493	1.19517e-13
HBA2	Clu-MPO	0.495	-1.42236	1.49653e-13
FCGR3A	Clu-MPO	0	-1.11869	2.04923e-13
CCL5	Clu-MPO	0.332	-1.87059	9.76341e-13
CD247	Clu-MPO	0.004	-0.922433	9.83008e-13
SERPINA1	Clu-MPO	0.006	-0.978581	1.74202e-12
FCN1	Clu-MPO	0.042	-1.53188	2.54534e-12
POLR3K	Clu-MPO	0.101	0.261487	2.94796e-12
HBB	Clu-MPO	0.873	-1.24515	5.48966e-12
UCP2	Clu-MPO	0.176	-0.856403	3.21789e-11
IL7R	Clu-MPO	0.002	-0.793437	4.32296e-11
S100A9	Clu-MPO	0.089	-2.10924	4.61777e-11
CCL4	Clu-MPO	0.004	-0.987174	5.72128e-11
PIK3IP1	Clu-MPO	0.008	-0.765018	1.24155e-10
KLRD1	Clu-MPO	0	-0.927399	1.42399e-10
CD27	Clu-MPO	0.004	-0.766185	1.49771e-10
KLRB1	Clu-MPO	0.002	-0.989571	1.80757e-10
CCR7	Clu-MPO	0	-0.775769	3.10281e-10
CD3G	Clu-MPO	0.004	-0.758816	3.59072e-10
LGALS3	Clu-MPO	0.009	-0.614292	1.23034e-09
CCDC23	Clu-MPO	0.159	0.327537	1.00942e-08
HLA-F	Clu-MPO	0.03	-0.747455	1.84195e-08
PPBP	Clu-MPO	0.021	-1.65528	2.19993e-08
STK4	Clu-MPO	0.047	-0.731272	3.58381e-08
CYTIP	Clu-MPO	0.023	-0.671496	4.83262e-08
PRDX2	Clu-MPO	0.104	-0.91747	7.87203e-08
S100A8	Clu-MPO	0.139	-2.17898	9.21688e-08
ANKRD12	Clu-MPO	0.072	-0.683651	1.07618e-07
EIF1	Clu-MPO	0.947	-0.275747	1.80498e-07
DDX5	Clu-MPO	0.317	-0.766851	2.03227e-07
EEF1D	Clu-MPO	0.922	-0.307517	2.90663e-07
STK17A	Clu-MPO	0.051	-0.732217	6.57696e-07
RARRES3	Clu-MPO	0.163	-0.859945	1.36444e-06
AES	Clu-MPO	0.207	-0.866822	5.30469e-06
PSMB3	Clu-MPO	0.478	0.476968	5.83103e-06
FYB	Clu-MPO	0.065	-0.691234	7.35974e-06
RPS26	Clu-MPO	0.734	-0.571748	1.17947e-05
LIMD2	Clu-MPO	0.381	-0.691131	7.02242e-05
2019-09-07	Clu-MPO	0.175	-0.788737	9.39175e-05
HLA-DQA1	Clu-MPO	0.032	-0.75403	0.000128869
PPP2R5C	Clu-MPO	0.046	-0.705923	0.00013255
HLA-DPB1	Clu-MPO	0.417	-0.96314	0.00018908
TOMM7	Clu-MPO	0.537	-0.536321	0.00038528
PCSK7	Clu-MPO	0.04	-0.614932	0.000408959
PIM1	Clu-MPO	0.04	-0.556419	0.000462202
GPSM3	Clu-MPO	0.336	-0.662949	0.000774801
HLA-DRB5	Clu-MPO	0.364	-0.27282	0.000996494
FAM65B	Clu-MPO	0.046	-0.55228	0.0014558
CTSS	Clu-MPO	0.211	-1.03287	0.00148951
CTSW	Clu-MPO	0.173	-1.21409	0.00153188
TBC1D10C	Clu-MPO	0.099	-0.583776	0.00170142
APOBEC3G	Clu-MPO	0.047	-0.685951	0.00171649
C12orf75	Clu-MPO	0.087	-0.864724	0.00172265
HOPX	Clu-MPO	0.07	-0.824865	0.00182057
LEPROTL1	Clu-MPO	0.078	-0.664429	0.00245705
HBA1	Clu-MPO	0.463	-1.36129	0.00255784
TNFAIP8	Clu-MPO	0.053	-0.583969	0.00377729
RAP1B	Clu-MPO	0.118	-0.753679	0.00552269
SELL	Clu-MPO	0.154	-0.716387	0.0080419
STMN1	Clu-CD34	0.876	2.0497	0
SPINK2	Clu-CD34	0.694	1.97579	0
KIAA0125	Clu-CD34	0.772	1.95161	0
PRSS57	Clu-CD34	0.698	1.63912	0
TUBA1B	Clu-CD34	0.816	1.5271	0
H2AFY	Clu-CD34	0.887	1.50088	0
C19orf77	Clu-CD34	0.587	1.45445	0
ITM2C	Clu-CD34	0.651	1.39427	0
ENO1	Clu-CD34	0.949	1.36122	0
HMGA1	Clu-CD34	0.671	1.312	0
TUBB	Clu-CD34	0.819	1.30007	0
CD34	Clu-CD34	0.519	1.29068	0
AF064858.8	Clu-CD34	0.464	1.27879	0
RP11-620J15.3	Clu-CD34	0.573	1.23923	0
MZB1	Clu-CD34	0.445	1.2102	0
HNRNPA1	Clu-CD34	0.974	1.20145	0
IGFBP7	Clu-CD34	0.614	1.16134	0
GAPDH	Clu-CD34	0.984	1.11557	0
SOX4	Clu-CD34	0.422	1.11288	0
ITM2A	Clu-CD34	0.77	1.11058	0
MDK	Clu-CD34	0.388	1.09693	0
CD99	Clu-CD34	0.899	1.08581	0
EBPL	Clu-CD34	0.629	1.08047	0
C1orf228	Clu-CD34	0.566	1.08002	0
CLEC11A	Clu-CD34	0.499	1.07992	0
IGLL1	Clu-CD34	0.319	1.07873	0
SPINT2	Clu-CD34	0.671	1.0662	0
DUT	Clu-CD34	0.736	1.06304	0
TYMS	Clu-CD34	0.358	1.05541	0
HSP90AB1	Clu-CD34	0.871	1.04853	0
NPM1	Clu-CD34	0.98	1.03603	0
IMPDH2	Clu-CD34	0.655	1.03321	0
TALDO1	Clu-CD34	0.838	1.02399	0
KIAA0101	Clu-CD34	0.344	1.00631	0
CDK6	Clu-CD34	0.43	0.977416	0
APEX1	Clu-CD34	0.691	0.958797	0
NPDC1	Clu-CD34	0.429	0.952931	0
EGFL7	Clu-CD34	0.431	0.951071	0
NUCB2	Clu-CD34	0.686	0.947811	0
HOXA9	Clu-CD34	0.344	0.944492	0
PEBP1	Clu-CD34	0.781	0.942452	0
ZFP36L2	Clu-CD34	0.862	0.937418	0
GSTP1	Clu-CD34	0.932	0.932773	0
BZW2	Clu-CD34	0.503	0.932002	0
SNHG7	Clu-CD34	0.61	0.897317	0
AC002454.1	Clu-CD34	0.343	0.887893	0
CAT	Clu-CD34	0.663	0.885782	0
NGFRAP1	Clu-CD34	0.566	0.881764	0
RPLP0	Clu-CD34	0.992	0.878066	0
HMGB2	Clu-CD34	0.643	0.872344	0
ADA	Clu-CD34	0.452	0.869602	0
PRDX1	Clu-CD34	0.69	0.86725	0
SOCS2	Clu-CD34	0.411	0.865446	0
LDHB	Clu-CD34	0.958	0.858454	0
NME1	Clu-CD34	0.496	0.853929	0
TXN	Clu-CD34	0.745	0.852496	0
HMGB1	Clu-CD34	0.904	0.849177	0
IGJ	Clu-CD34	0.316	0.847236	0
FABP5	Clu-CD34	0.425	0.842858	0
SERPINB1	Clu-CD34	0.748	0.840365	0
C1QBP	Clu-CD34	0.734	0.832717	0
HSPD1	Clu-CD34	0.536	0.830756	0
LYL1	Clu-CD34	0.524	0.820093	0
EEF1B2	Clu-CD34	0.955	0.809272	0
CYTL1	Clu-CD34	0.325	0.808501	0
TSC22D1	Clu-CD34	0.425	0.807666	0
SLC25A5	Clu-CD34	0.805	0.804201	0
AKR1C3	Clu-CD34	0.44	0.803376	0
RPL7A	Clu-CD34	0.988	0.781161	0
LIMS1	Clu-CD34	0.511	0.776448	0
HINT1	Clu-CD34	0.948	0.770746	0
MEST	Clu-CD34	0.345	0.761828	0
SNRPD1	Clu-CD34	0.637	0.761759	0
ILF2	Clu-CD34	0.62	0.754018	0
MYL6B	Clu-CD34	0.333	0.749819	0
RANBP1	Clu-CD34	0.693	0.743559	0
ANP32B	Clu-CD34	0.713	0.743236	0
MBOAT7	Clu-CD34	0.351	0.741364	0
CDK4	Clu-CD34	0.409	0.739974	0
BEX4	Clu-CD34	0.48	0.738196	0
GNA15	Clu-CD34	0.33	0.732829	0
CCT8	Clu-CD34	0.675	0.731524	0
SMC4	Clu-CD34	0.375	0.731417	0
RBMX	Clu-CD34	0.658	0.725424	0
YWHAE	Clu-CD34	0.457	0.724698	0
PLIN3	Clu-CD34	0.353	0.721033	0
SSBP2	Clu-CD34	0.326	0.717934	0
SLC25A3	Clu-CD34	0.805	0.714359	0
HMGN3	Clu-CD34	0.73	0.713915	0
GNB2L1	Clu-CD34	0.991	0.711096	0
NME4	Clu-CD34	0.477	0.706062	0
CCT2	Clu-CD34	0.51	0.704231	0
LAPTM4B	Clu-CD34	0.305	0.703405	0
EIF4A1	Clu-CD34	0.935	0.702459	0
EEF2	Clu-CD34	0.966	0.702279	0
ST18	Clu-CD34	0.2	0.699568	0
GTSF1	Clu-CD34	0.334	0.698332	0
TMEM14C	Clu-CD34	0.459	0.694759	0
MARCKSL1	Clu-CD34	0.405	0.689037	0
VPREB1	Clu-CD34	0.212	0.687361	0
RPL22L1	Clu-CD34	0.484	0.686386	0
IL1B	Clu-CD34	0.274	0.684703	0
SCCPDH	Clu-CD34	0.373	0.684545	0
CXXC5	Clu-CD34	0.374	0.68173	0
NPM3	Clu-CD34	0.395	0.677958	0
MLLT11	Clu-CD34	0.309	0.677504	0
MPST	Clu-CD34	0.421	0.677472	0
BTF3	Clu-CD34	0.981	0.677059	0
HEMGN	Clu-CD34	0.301	0.673699	0
CKS2	Clu-CD34	0.339	0.673244	0
RAN	Clu-CD34	0.767	0.673062	0
NCF4	Clu-CD34	0.402	0.672541	0
2019-09-06	Clu-CD34	0.532	0.67157	0
HMGN1	Clu-CD34	0.865	0.669338	0
CLNS1A	Clu-CD34	0.59	0.669021	0
ATP5A1	Clu-CD34	0.803	0.668891	0
HOXA10	Clu-CD34	0.267	0.667343	0
PRDX6	Clu-CD34	0.703	0.666874	0
MSI2	Clu-CD34	0.332	0.666383	0
LSM2	Clu-CD34	0.566	0.661029	0
MIF	Clu-CD34	0.755	0.659818	0
RTN4	Clu-CD34	0.628	0.657988	0
PSMB5	Clu-CD34	0.449	0.655279	0
EIF3L	Clu-CD34	0.843	0.648174	0
ATP5B	Clu-CD34	0.731	0.645869	0
TKT	Clu-CD34	0.676	0.644257	0
MORF4L2	Clu-CD34	0.46	0.644185	0
CAPG	Clu-CD34	0.418	0.644042	0
IDH2	Clu-CD34	0.55	0.643147	0
BAALC	Clu-CD34	0.229	0.642571	0
MCM3	Clu-CD34	0.33	0.641504	0
STOML2	Clu-CD34	0.489	0.641207	0
NASP	Clu-CD34	0.396	0.63982	0
ZNF22	Clu-CD34	0.468	0.639722	0
GGCT	Clu-CD34	0.392	0.6329	0
C19orf48	Clu-CD34	0.344	0.630736	0
LDHA	Clu-CD34	0.764	0.629249	0
NMI	Clu-CD34	0.504	0.627807	0
GSN	Clu-CD34	0.337	0.626644	0
FHL1	Clu-CD34	0.26	0.625719	0
SRSF3	Clu-CD34	0.765	0.622334	0
TM7SF3	Clu-CD34	0.343	0.621548	0
RPS4X	Clu-CD34	0.999	0.62149	0
AKR1A1	Clu-CD34	0.467	0.619352	0
LAT2	Clu-CD34	0.38	0.618006	0
SYPL1	Clu-CD34	0.507	0.616266	0
FAM26F	Clu-CD34	0.442	0.615301	0
AMD1	Clu-CD34	0.371	0.614907	0
PCNA	Clu-CD34	0.341	0.613748	0
NFE2	Clu-CD34	0.331	0.613551	0
COMT	Clu-CD34	0.462	0.611536	0
SRSF2	Clu-CD34	0.648	0.608101	0
EEF1A1	Clu-CD34	0.98	0.606318	0
NIPSNAP3A	Clu-CD34	0.366	0.606166	0
NUDT5	Clu-CD34	0.421	0.60546	0
HSP90AA1	Clu-CD34	0.757	0.604634	0
DNAJC1	Clu-CD34	0.361	0.603744	0
TMEM173	Clu-CD34	0.423	0.603369	0
RPS5	Clu-CD34	0.995	0.599301	0
OLA1	Clu-CD34	0.438	0.594779	0
DNAJC9	Clu-CD34	0.377	0.594418	0
RPL10A	Clu-CD34	0.998	0.593775	0
SPNS3	Clu-CD34	0.26	0.592627	0
LSM4	Clu-CD34	0.519	0.590267	0
FKBP3	Clu-CD34	0.46	0.589472	0
CCNG1	Clu-CD34	0.537	0.589064	0
HHEX	Clu-CD34	0.364	0.587788	0
CCT4	Clu-CD34	0.599	0.584713	0
PAICS	Clu-CD34	0.288	0.583014	0
TCEAL4	Clu-CD34	0.307	0.582902	0
WBP5	Clu-CD34	0.255	0.581895	0
NHP2	Clu-CD34	0.594	0.580644	0
COMMD3	Clu-CD34	0.463	0.58022	0
ARL2	Clu-CD34	0.458	0.57728	0
MPG	Clu-CD34	0.447	0.576952	0
SLC39A3	Clu-CD34	0.34	0.576349	0
ATP5G3	Clu-CD34	0.714	0.571433	0
FAM212A	Clu-CD34	0.257	0.570033	0
LUC7L3	Clu-CD34	0.435	0.56865	0
HSPB1	Clu-CD34	0.544	0.566045	0
RPS2	Clu-CD34	0.999	0.565964	0
VDAC1	Clu-CD34	0.49	0.562303	0
RPS24	Clu-CD34	0.994	0.561968	0
MYB	Clu-CD34	0.226	0.561278	0
RPL5	Clu-CD34	0.989	0.560649	0
RBPMS	Clu-CD34	0.187	0.557213	0
NUDT1	Clu-CD34	0.402	0.556673	0
MDH1	Clu-CD34	0.601	0.55594	0
AHCY	Clu-CD34	0.256	0.554286	0
HSBP1	Clu-CD34	0.548	0.551888	0
CCNI	Clu-CD34	0.779	0.551625	0
RNASEH2B	Clu-CD34	0.468	0.550887	0
NREP	Clu-CD34	0.195	0.548553	0
LSM7	Clu-CD34	0.751	0.547728	0
CD82	Clu-CD34	0.295	0.547666	0
RPS9	Clu-CD34	0.999	0.545182	0
MAT2A	Clu-CD34	0.274	0.543512	0
TIMM13	Clu-CD34	0.541	0.540127	0
COX5A	Clu-CD34	0.679	0.536664	0
KHDRBS1	Clu-CD34	0.548	0.536385	0
GSTO1	Clu-CD34	0.661	0.534449	0
PAFAH1B3	Clu-CD34	0.311	0.53294	0
AIF1	Clu-CD34	0.836	0.532647	0
PTPLA	Clu-CD34	0.236	0.53096	0
C6orf48	Clu-CD34	0.673	0.530283	0
PARP1	Clu-CD34	0.485	0.526722	0
PABPN1	Clu-CD34	0.385	0.524633	0
GATA2	Clu-CD34	0.192	0.523488	0
RPL29	Clu-CD34	0.99	0.521731	0
SRSF9	Clu-CD34	0.617	0.520927	0
CPXM1	Clu-CD34	0.195	0.520816	0
SULT1A1	Clu-CD34	0.327	0.52052	0
CLTA	Clu-CD34	0.561	0.520201	0
HNRNPA0	Clu-CD34	0.736	0.519547	0
OSTC	Clu-CD34	0.577	0.518851	0
PRDX3	Clu-CD34	0.49	0.516797	0
ACY3	Clu-CD34	0.139	0.516521	0
GGH	Clu-CD34	0.24	0.514221	0
C11orf31	Clu-CD34	0.727	0.512323	0
PNISR	Clu-CD34	0.7	0.511639	0
MCM7	Clu-CD34	0.258	0.511614	0
RP11-354E11.2	Clu-CD34	0.182	0.51148	0
CDT1	Clu-CD34	0.219	0.510822	0
SNRPE	Clu-CD34	0.554	0.510054	0
HPRT1	Clu-CD34	0.39	0.508741	0
PRSS21	Clu-CD34	0.21	0.506532	0
PSMB7	Clu-CD34	0.567	0.506138	0
EI24	Clu-CD34	0.306	0.505692	0
TUFM	Clu-CD34	0.625	0.50492	0
EIF3M	Clu-CD34	0.709	0.503872	0
GDI2	Clu-CD34	0.647	0.502751	0
CKS1B	Clu-CD34	0.267	0.502126	0
ATP5C1	Clu-CD34	0.609	0.499853	0
MRPL16	Clu-CD34	0.386	0.49482	0
SMS	Clu-CD34	0.446	0.494817	0
TNFRSF1A	Clu-CD34	0.325	0.493445	0
RPS3	Clu-CD34	1	0.493074	0
PRDX4	Clu-CD34	0.338	0.490832	0
SERBP1	Clu-CD34	0.601	0.490373	0
SNHG8	Clu-CD34	0.537	0.489891	0
DCTPP1	Clu-CD34	0.343	0.486938	0
NPR3	Clu-CD34	0.164	0.486429	0
RPL15	Clu-CD34	0.999	0.485251	0
RUNX1	Clu-CD34	0.262	0.483871	0
RPL12	Clu-CD34	0.998	0.483711	0
UROD	Clu-CD34	0.37	0.483637	0
ATXN10	Clu-CD34	0.406	0.482351	0
VDAC2	Clu-CD34	0.549	0.480078	0
PXMP2	Clu-CD34	0.229	0.480026	0
DARS	Clu-CD34	0.367	0.47928	0
HDAC2	Clu-CD34	0.381	0.478642	0
MRPL11	Clu-CD34	0.399	0.478536	0
PHGDH	Clu-CD34	0.208	0.476578	0
MGST2	Clu-CD34	0.261	0.475043	0
CTC-524C5.2	Clu-CD34	0.286	0.473641	0
SET	Clu-CD34	0.363	0.473138	0
GNAI1	Clu-CD34	0.178	0.47239	0
TTC3	Clu-CD34	0.392	0.471215	0
RPS6	Clu-CD34	0.999	0.471134	0
DYNLL1	Clu-CD34	0.755	0.470256	0
EIF3D	Clu-CD34	0.702	0.470158	0
PSMB2	Clu-CD34	0.532	0.470117	0
YWHAH	Clu-CD34	0.461	0.4686	0
TMIGD2	Clu-CD34	0.253	0.468514	0
HEBP1	Clu-CD34	0.289	0.467722	0
LGALS3BP	Clu-CD34	0.261	0.465331	0
TPGS2	Clu-CD34	0.324	0.4635	0
TK1	Clu-CD34	0.155	0.462939	0
DDAH2	Clu-CD34	0.229	0.461658	0
HPCAL1	Clu-CD34	0.348	0.45999	0
C1QTNF4	Clu-CD34	0.143	0.459463	0
MPC2	Clu-CD34	0.43	0.458774	0
TUBA1C	Clu-CD34	0.225	0.45753	0
VDAC3	Clu-CD34	0.494	0.457111	0
LEPROT	Clu-CD34	0.316	0.45691	0
RAB13	Clu-CD34	0.216	0.455516	0
RBBP4	Clu-CD34	0.406	0.455479	0
TSPAN13	Clu-CD34	0.246	0.453563	0
ETS2	Clu-CD34	0.19	0.453289	0
BANF1	Clu-CD34	0.494	0.452278	0
LST1	Clu-CD34	0.812	0.450079	0
LAPTM4A	Clu-CD34	0.534	0.449903	0
POLD2	Clu-CD34	0.309	0.448879	0
ATP5G1	Clu-CD34	0.516	0.448586	0
TCF4	Clu-CD34	0.159	0.448367	0
TCP1	Clu-CD34	0.384	0.447761	0
MLF2	Clu-CD34	0.435	0.447317	0
ESD	Clu-CD34	0.392	0.446132	0
RXFP1	Clu-CD34	0.147	0.445689	0
SRP72	Clu-CD34	0.326	0.445373	0
GAPT	Clu-CD34	0.231	0.445269	0
TBXAS1	Clu-CD34	0.277	0.445159	0
MAPKAPK3	Clu-CD34	0.279	0.444965	0
RUVBL2	Clu-CD34	0.291	0.444779	0
GLUL	Clu-CD34	0.363	0.444448	0
PNN	Clu-CD34	0.331	0.444418	0
AKR7A2	Clu-CD34	0.366	0.44348	0
C11orf74	Clu-CD34	0.163	0.441472	0
LAGE3	Clu-CD34	0.424	0.440698	0
ERGIC3	Clu-CD34	0.495	0.438987	0
TCEAL8	Clu-CD34	0.448	0.438418	0
QARS	Clu-CD34	0.355	0.437004	0
KDELR1	Clu-CD34	0.299	0.436198	0
PSMG1	Clu-CD34	0.262	0.435773	0
MAP1A	Clu-CD34	0.139	0.434653	0
NONO	Clu-CD34	0.302	0.434372	0
DKC1	Clu-CD34	0.289	0.434361	0
AP001171.1	Clu-CD34	0.165	0.432677	0
MRPL15	Clu-CD34	0.3	0.431807	0
IQGAP2	Clu-CD34	0.296	0.430357	0
HPGDS	Clu-CD34	0.159	0.42921	0
FSCN1	Clu-CD34	0.184	0.42872	0
NIT2	Clu-CD34	0.269	0.428638	0
C14orf166	Clu-CD34	0.609	0.427587	0
SRM	Clu-CD34	0.271	0.427235	0
TXNL1	Clu-CD34	0.38	0.42511	0
ZNF428	Clu-CD34	0.456	0.423436	0
NUTF2	Clu-CD34	0.432	0.423314	0
TNFSF13B	Clu-CD34	0.413	0.423048	0
FIBP	Clu-CD34	0.458	0.422886	0
C9orf89	Clu-CD34	0.326	0.42272	0
NDUFS3	Clu-CD34	0.411	0.421727	0
GTF3C6	Clu-CD34	0.471	0.420486	0
GUCY1A3	Clu-CD34	0.154	0.420308	0
HADH	Clu-CD34	0.236	0.419575	0
IL18	Clu-CD34	0.174	0.418871	0
CPNE1	Clu-CD34	0.373	0.418655	0
H2AFV	Clu-CD34	0.502	0.417297	0
GRHPR	Clu-CD34	0.298	0.416955	0
CREG1	Clu-CD34	0.308	0.416131	0
NOB1	Clu-CD34	0.269	0.414541	0
COMMD7	Clu-CD34	0.478	0.413171	0
UQCRC2	Clu-CD34	0.538	0.413167	0
FKBP4	Clu-CD34	0.248	0.412879	0
SFPQ	Clu-CD34	0.371	0.412183	0
CCDC28B	Clu-CD34	0.281	0.41141	0
RPL3	Clu-CD34	0.999	0.410335	0
GINS2	Clu-CD34	0.173	0.410287	0
IRF2BP2	Clu-CD34	0.287	0.409919	0
IP6K2	Clu-CD34	0.304	0.409393	0
MCM5	Clu-CD34	0.217	0.408861	0
CENPU	Clu-CD34	0.187	0.408013	0
KCNK17	Clu-CD34	0.13	0.40796	0
BTK	Clu-CD34	0.248	0.407252	0
FAH	Clu-CD34	0.228	0.406135	0
PHB2	Clu-CD34	0.363	0.405837	0
MRPL51	Clu-CD34	0.489	0.405569	0
HNRNPC	Clu-CD34	0.592	0.404367	0
DENND6B	Clu-CD34	0.153	0.403764	0
MPLKIP	Clu-CD34	0.435	0.403514	0
CCDC90B	Clu-CD34	0.3	0.40265	0
CDCA7	Clu-CD34	0.198	0.401727	0
WDR61	Clu-CD34	0.368	0.401226	0
HADHB	Clu-CD34	0.308	0.400731	0
GAMT	Clu-CD34	0.249	0.399774	0
REPIN1	Clu-CD34	0.234	0.398378	0
TMEM261	Clu-CD34	0.359	0.398359	0
RNF220	Clu-CD34	0.191	0.397203	0
PRAM1	Clu-CD34	0.215	0.396908	0
MRFAP1	Clu-CD34	0.392	0.395931	0
TRAPPC6A	Clu-CD34	0.529	0.395719	0
SNRPA	Clu-CD34	0.301	0.395121	0
ORAI3	Clu-CD34	0.225	0.395119	0
SATB1	Clu-CD34	0.214	0.393637	0
CCT6A	Clu-CD34	0.406	0.393465	0
SERPINB6	Clu-CD34	0.386	0.393388	0
ZNF667-AS1	Clu-CD34	0.168	0.392996	0
MLLT3	Clu-CD34	0.204	0.392065	0
FBL	Clu-CD34	0.532	0.391968	0
MTHFD2L	Clu-CD34	0.199	0.391518	0
EIF1AX	Clu-CD34	0.356	0.390285	0
TUBB6	Clu-CD34	0.165	0.389566	0
MRPL18	Clu-CD34	0.463	0.388825	0
CSNK2B	Clu-CD34	0.539	0.38843	0
NDUFB5	Clu-CD34	0.493	0.388218	0
UFC1	Clu-CD34	0.608	0.388003	0
ERGIC1	Clu-CD34	0.212	0.387635	0
G6PC3	Clu-CD34	0.168	0.38741	0
GMNN	Clu-CD34	0.177	0.386532	0
ETFB	Clu-CD34	0.471	0.385978	0
LYPLA1	Clu-CD34	0.368	0.384878	0
CCT5	Clu-CD34	0.404	0.384713	0
PHB	Clu-CD34	0.466	0.384561	0
SVOPL	Clu-CD34	0.143	0.384141	0
PGD	Clu-CD34	0.305	0.384003	0
TOMM22	Clu-CD34	0.48	0.38397	0
ATIC	Clu-CD34	0.254	0.381978	0
TAF7	Clu-CD34	0.429	0.3817	0
PMVK	Clu-CD34	0.288	0.378633	0
S100Z	Clu-CD34	0.151	0.378346	0
PSMA5	Clu-CD34	0.471	0.377278	0
PPP2R1A	Clu-CD34	0.378	0.376544	0
MAGEF1	Clu-CD34	0.235	0.376474	0
MRPL32	Clu-CD34	0.304	0.375293	0
TSPAN3	Clu-CD34	0.211	0.375275	0
NDUFA8	Clu-CD34	0.329	0.373671	0
ZWINT	Clu-CD34	0.165	0.373132	0
BCL11A	Clu-CD34	0.146	0.372565	0
PMPCB	Clu-CD34	0.372	0.372044	0
TPM4	Clu-CD34	0.383	0.371245	0
FBXW9	Clu-CD34	0.157	0.370889	0
RBBP7	Clu-CD34	0.397	0.369175	0
PRMT1	Clu-CD34	0.463	0.368547	0
DCAF13	Clu-CD34	0.278	0.368234	0
CCNB1IP1	Clu-CD34	0.195	0.367023	0
CHD4	Clu-CD34	0.239	0.36588	0
HNRNPR	Clu-CD34	0.468	0.365671	0
MRPL4	Clu-CD34	0.274	0.362851	0
EIF4EBP1	Clu-CD34	0.351	0.361896	0
THYN1	Clu-CD34	0.358	0.361269	0
MAD2L1	Clu-CD34	0.208	0.360537	0
SMARCB1	Clu-CD34	0.333	0.36053	0
CCT3	Clu-CD34	0.501	0.360414	0
EIF4A3	Clu-CD34	0.306	0.360246	0
ISYNA1	Clu-CD34	0.168	0.36014	0
MSRB2	Clu-CD34	0.225	0.359579	0
RPP40	Clu-CD34	0.168	0.359281	0
NGLY1	Clu-CD34	0.233	0.358515	0
CUEDC2	Clu-CD34	0.316	0.358045	0
H1FX	Clu-CD34	0.211	0.357568	0
PADI4	Clu-CD34	0.177	0.357143	0
LINC00152	Clu-CD34	0.486	0.357047	0
MRPL3	Clu-CD34	0.339	0.355754	0
ECHS1	Clu-CD34	0.307	0.354562	0
FLT3	Clu-CD34	0.124	0.353322	0
HNRNPAB	Clu-CD34	0.232	0.352827	0
LINC00938	Clu-CD34	0.189	0.352755	0
CCT7	Clu-CD34	0.414	0.351439	0
NAA20	Clu-CD34	0.399	0.351229	0
SLBP	Clu-CD34	0.337	0.350732	0
MRPL12	Clu-CD34	0.272	0.350479	0
NDUFS4	Clu-CD34	0.371	0.348824	0
TAF9	Clu-CD34	0.461	0.348514	0
C21orf33	Clu-CD34	0.278	0.347054	0
CASP6	Clu-CD34	0.202	0.346287	0
TSEN34	Clu-CD34	0.262	0.345853	0
RNPS1	Clu-CD34	0.579	0.345539	0
HAUS1	Clu-CD34	0.291	0.344443	0
UBE2E1	Clu-CD34	0.263	0.341832	0
JUP	Clu-CD34	0.132	0.339556	0
RNASEH2A	Clu-CD34	0.205	0.339375	0
FANCL	Clu-CD34	0.145	0.339046	0
ACOT13	Clu-CD34	0.171	0.338871	0
SERPING1	Clu-CD34	0.145	0.337959	0
ARPC1A	Clu-CD34	0.29	0.335515	0
PSIP1	Clu-CD34	0.378	0.335216	0
CD33	Clu-CD34	0.202	0.33498	0
TFG	Clu-CD34	0.254	0.334976	0
ZNRD1	Clu-CD34	0.29	0.334859	0
AAMDC	Clu-CD34	0.18	0.334828	0
SRD5A3	Clu-CD34	0.182	0.334704	0
PAPSS1	Clu-CD34	0.2	0.334549	0
ERCC1	Clu-CD34	0.291	0.333596	0
PRKRA	Clu-CD34	0.278	0.333012	0
CMBL	Clu-CD34	0.141	0.332956	0
TEX30	Clu-CD34	0.195	0.332123	0
HSH2D	Clu-CD34	0.19	0.330993	0
WDR18	Clu-CD34	0.247	0.330156	0
ACTL6A	Clu-CD34	0.235	0.329875	0
SDCCAG8	Clu-CD34	0.216	0.329277	0
POLR2H	Clu-CD34	0.239	0.327927	0
ETV6	Clu-CD34	0.141	0.326921	0
AK2	Clu-CD34	0.281	0.326207	0
ACADM	Clu-CD34	0.249	0.323711	0
NPW	Clu-CD34	0.122	0.323264	0
CSTF3	Clu-CD34	0.211	0.323259	0
GAR1	Clu-CD34	0.201	0.323139	0
NDUFV1	Clu-CD34	0.34	0.322966	0
DNAJC12	Clu-CD34	0.14	0.322671	0
LTC4S	Clu-CD34	0.135	0.322066	0
RMI2	Clu-CD34	0.134	0.321623	0
UBE2E3	Clu-CD34	0.373	0.321172	0
PCBD1	Clu-CD34	0.25	0.320549	0
SNRNP70	Clu-CD34	0.295	0.320184	0
MRPS27	Clu-CD34	0.188	0.319307	0
FES	Clu-CD34	0.197	0.318411	0
MRPL45	Clu-CD34	0.192	0.318187	0
TCEAL1	Clu-CD34	0.186	0.317724	0
FARSA	Clu-CD34	0.235	0.31669	0
TMEM38B	Clu-CD34	0.186	0.312726	0
KLHDC2	Clu-CD34	0.273	0.312687	0
CNPY2	Clu-CD34	0.415	0.312529	0
ILF3	Clu-CD34	0.234	0.311897	0
ADH5	Clu-CD34	0.335	0.31048	0
C14orf1	Clu-CD34	0.292	0.309112	0
LXN	Clu-CD34	0.141	0.308662	0
SMYD3	Clu-CD34	0.158	0.307931	0
ANKRD28	Clu-CD34	0.151	0.306449	0
HIBCH	Clu-CD34	0.192	0.30644	0
RP11-25K19.1	Clu-CD34	0.168	0.305778	0
ADSL	Clu-CD34	0.261	0.305444	0
NME1-NME2	Clu-CD34	0.178	0.304587	0
CENPH	Clu-CD34	0.176	0.304186	0
MTF2	Clu-CD34	0.267	0.304108	0
LRRC41	Clu-CD34	0.171	0.3039	0
PARVB	Clu-CD34	0.21	0.303615	0
THOC6	Clu-CD34	0.25	0.302497	0
CAPRIN1	Clu-CD34	0.18	0.302201	0
HMG20B	Clu-CD34	0.228	0.300608	0
ABHD14B	Clu-CD34	0.353	0.300443	0
TRIP6	Clu-CD34	0.14	0.29934	0
TM4SF1	Clu-CD34	0.108	0.297616	0
2019-09-11	Clu-CD34	0.183	0.296545	0
GNL3	Clu-CD34	0.27	0.296328	0
IL3RA	Clu-CD34	0.109	0.296186	0
ZNRF1	Clu-CD34	0.112	0.296059	0
ASB9	Clu-CD34	0.13	0.295985	0
IPO11	Clu-CD34	0.121	0.294807	0
SLC39A4	Clu-CD34	0.185	0.294757	0
QPRT	Clu-CD34	0.113	0.293742	0
MACROD1	Clu-CD34	0.139	0.29345	0
SSRP1	Clu-CD34	0.245	0.29209	0
DERA	Clu-CD34	0.22	0.290544	0
PHTF1	Clu-CD34	0.116	0.289288	0
UNG	Clu-CD34	0.145	0.288388	0
EBNA1BP2	Clu-CD34	0.227	0.287438	0
ACN9	Clu-CD34	0.299	0.287099	0
HOXA7	Clu-CD34	0.108	0.287086	0
RRM1	Clu-CD34	0.173	0.285886	0
SDSL	Clu-CD34	0.119	0.28523	0
CREB3L4	Clu-CD34	0.102	0.283434	0
TFPI	Clu-CD34	0.103	0.282629	0
FAM213A	Clu-CD34	0.132	0.281713	0
DTD1	Clu-CD34	0.224	0.281295	0
GPX7	Clu-CD34	0.171	0.280282	0
ISOC2	Clu-CD34	0.223	0.280253	0
MIS18A	Clu-CD34	0.157	0.279611	0
C9orf9	Clu-CD34	0.107	0.277103	0
EPDR1	Clu-CD34	0.111	0.275586	0
HSD17B12	Clu-CD34	0.178	0.272341	0
ERG	Clu-CD34	0.108	0.271518	0
CBX5	Clu-CD34	0.157	0.267391	0
LRRC61	Clu-CD34	0.14	0.26693	0
TARBP1	Clu-CD34	0.14	0.263973	0
PPP1R14B	Clu-CD34	0.108	0.263497	0
IFITM3	Clu-CD34	0.62	0.260945	0
RAB27B	Clu-CD34	0.125	0.260711	0
CENPW	Clu-CD34	0.143	0.259732	0
MCM4	Clu-CD34	0.116	0.259499	0
MTHFD1	Clu-CD34	0.144	0.259301	0
TRIM28	Clu-CD34	0.159	0.258667	0
RCN1	Clu-CD34	0.128	0.258606	0
GMDS	Clu-CD34	0.143	0.257905	0
NDUFAF6	Clu-CD34	0.148	0.255141	0
IFI27L1	Clu-CD34	0.142	0.255021	0
PLAGL1	Clu-CD34	0.111	0.254023	0
SLC39A8	Clu-CD34	0.14	0.251775	0
FAM216A	Clu-CD34	0.117	0.250681	0
RPL21	Clu-CD34	0.996	-0.656015	0
TMSB10	Clu-CD34	0.991	-0.787401	0
TMSB4X	Clu-CD34	0.992	-0.812714	0
RPS27	Clu-CD34	0.994	-0.874778	0
MALAT1	Clu-CD34	0.993	-0.946536	0
B2M	Clu-CD34	0.999	-1.28848	0
HLA-B	Clu-CD34	0.893	-1.37222	0
HLA-C	Clu-CD34	0.764	-1.60741	0
CD52	Clu-CD34	0.305	-2.31104	0
IL32	Clu-CD34	0.038	-2.74114	0
ACTG1	Clu-CD34	0.95	0.621454	8.54332e-304
NOA1	Clu-CD34	0.196	0.287718	5.12729e-303
TPGS1	Clu-CD34	0.269	0.315988	1.03177e-301
RUVBL1	Clu-CD34	0.208	0.297483	3.04491e-301
EXOSC5	Clu-CD34	0.192	0.285348	5.41977e-300
PDCD2	Clu-CD34	0.366	0.30717	9.32782e-300
STRAP	Clu-CD34	0.407	0.324384	1.71403e-299
PPA2	Clu-CD34	0.273	0.30863	2.14633e-299
FDPS	Clu-CD34	0.353	0.304902	2.27843e-299
NUDCD2	Clu-CD34	0.372	0.291749	2.74111e-299
NTHL1	Clu-CD34	0.174	0.252428	4.52494e-299
HSD17B11	Clu-CD34	0.589	0.410269	1.43597e-298
ST13	Clu-CD34	0.723	0.442934	1.55719e-298
FDFT1	Clu-CD34	0.338	0.326008	1.99097e-298
ARMC10	Clu-CD34	0.219	0.309244	2.74468e-298
RSL1D1	Clu-CD34	0.595	0.392633	3.89682e-298
SLC44A1	Clu-CD34	0.125	0.257361	8.69797e-298
NAP1L1	Clu-CD34	0.78	0.505654	8.82174e-298
GANAB	Clu-CD34	0.154	0.253104	1.77947e-297
COA4	Clu-CD34	0.244	0.287911	4.69656e-297
U2AF1	Clu-CD34	0.644	0.372913	7.84378e-297
C21orf59	Clu-CD34	0.224	0.271069	1.33004e-296
DAZAP1	Clu-CD34	0.273	0.288758	1.12834e-295
ELAVL1	Clu-CD34	0.308	0.333801	3.68202e-295
VGLL4	Clu-CD34	0.14	0.258822	4.13238e-295
RILPL2	Clu-CD34	0.309	0.323438	1.26056e-294
ENSA	Clu-CD34	0.489	0.34632	2.76755e-294
PTOV1	Clu-CD34	0.179	0.277365	3.6199e-292
TUBA1A	Clu-CD34	0.398	0.453966	6.44557e-292
RPAIN	Clu-CD34	0.281	0.286376	8.25572e-292
RPL7L1	Clu-CD34	0.246	0.260044	1.65445e-291
PKIG	Clu-CD34	0.17	0.260453	1.73472e-291
ALDH1A1	Clu-CD34	0.146	0.342291	2.35985e-291
EIF3I	Clu-CD34	0.458	0.332771	3.83731e-291
SPARC	Clu-CD34	0.202	0.286714	4.61749e-291
MORF4L1	Clu-CD34	0.582	0.362991	6.76108e-291
EID1	Clu-CD34	0.757	0.522341	1.68981e-290
GTF2A2	Clu-CD34	0.466	0.326832	1.79507e-290
SRP9	Clu-CD34	0.642	0.390845	1.93033e-289
MRP63	Clu-CD34	0.524	0.341347	1.99447e-289
TOMM40	Clu-CD34	0.238	0.269853	2.56797e-288
DNPH1	Clu-CD34	0.32	0.314942	5.64782e-288
NHLRC3	Clu-CD34	0.295	0.331296	1.27726e-287
SF3B14	Clu-CD34	0.566	0.32537	2.9034e-287
HIST1H4C	Clu-CD34	0.236	0.561613	3.05864e-286
ETHE1	Clu-CD34	0.326	0.315335	7.69096e-286
IAH1	Clu-CD34	0.324	0.320297	1.26514e-285
MDH2	Clu-CD34	0.523	0.350453	1.71354e-285
MLEC	Clu-CD34	0.234	0.279691	4.25265e-285
NDUFV2	Clu-CD34	0.533	0.403505	4.70132e-285
HMGB3	Clu-CD34	0.121	0.259699	7.74507e-285
RHEB	Clu-CD34	0.422	0.302687	9.51725e-285
NOP56	Clu-CD34	0.281	0.279349	3.18446e-284
PTTG1IP	Clu-CD34	0.188	0.32787	5.23315e-284
TMEM14B	Clu-CD34	0.478	0.325494	5.92037e-284
VAPA	Clu-CD34	0.563	0.395414	2.56425e-283
YBX1	Clu-CD34	0.955	0.606998	3.08801e-283
VKORC1	Clu-CD34	0.288	0.270907	1.13801e-282
SAAL1	Clu-CD34	0.139	0.289384	1.67616e-282
MRPS23	Clu-CD34	0.277	0.330632	7.8233e-282
PSMA1	Clu-CD34	0.608	0.36923	9.07797e-282
C4orf27	Clu-CD34	0.23	0.306845	4.57538e-281
RPS18	Clu-CD34	1	0.385402	7.23695e-281
NUPL2	Clu-CD34	0.235	0.274918	8.25809e-281
NDUFA10	Clu-CD34	0.347	0.25264	1.3836e-280
CALR	Clu-CD34	0.489	0.376049	2.37785e-280
TIMMDC1	Clu-CD34	0.234	0.272706	3.21303e-280
RPN1	Clu-CD34	0.296	0.275888	4.46212e-280
DTYMK	Clu-CD34	0.215	0.292468	1.19574e-278
CFDP1	Clu-CD34	0.303	0.311551	3.67424e-278
HADHA	Clu-CD34	0.406	0.325569	4.36063e-278
PDHA1	Clu-CD34	0.211	0.258634	2.32588e-277
RPN2	Clu-CD34	0.416	0.270961	6.62269e-277
MZT2B	Clu-CD34	0.596	0.378889	8.75853e-277
VPS25	Clu-CD34	0.221	0.299671	1.286e-276
QDPR	Clu-CD34	0.198	0.282349	4.19663e-276
PTDSS1	Clu-CD34	0.22	0.276043	7.71327e-275
SPG20	Clu-CD34	0.184	0.3134	8.38222e-275
H2AFZ	Clu-CD34	0.742	0.854987	2.18604e-273
AP1S1	Clu-CD34	0.239	0.262003	2.76057e-273
SETD5-AS1	Clu-CD34	0.333	0.300311	5.06703e-273
LGALS9	Clu-CD34	0.336	0.369536	6.38755e-273
RAB34	Clu-CD34	0.162	0.275578	8.19297e-273
NANS	Clu-CD34	0.229	0.311868	1.00655e-272
MED28	Clu-CD34	0.377	0.286831	1.22499e-272
C1orf63	Clu-CD34	0.381	0.340906	1.47253e-272
PSMA3	Clu-CD34	0.369	0.321023	5.99588e-272
SYTL1	Clu-CD34	0.334	0.321024	1.22982e-271
TCEA2	Clu-CD34	0.16	0.269349	1.40762e-271
NUCKS1	Clu-CD34	0.348	0.330609	2.72858e-271
PTTG1	Clu-CD34	0.231	0.392907	6.52658e-271
TARS	Clu-CD34	0.163	0.250261	6.73398e-271
RPS23	Clu-CD34	0.998	0.425603	7.78913e-271
YWHAQ	Clu-CD34	0.571	0.295341	4.59363e-270
NIFK	Clu-CD34	0.254	0.271869	4.67636e-270
DCUN1D5	Clu-CD34	0.203	0.250624	2.60399e-269
ERH	Clu-CD34	0.697	0.448004	3.16411e-269
JAGN1	Clu-CD34	0.273	0.276168	5.20035e-269
TESPA1	Clu-CD34	0.18	0.271359	9.97398e-269
DNAJA1	Clu-CD34	0.406	0.348672	1.22644e-268
TAGLN2	Clu-CD34	0.751	0.426484	2.93477e-268
CHID1	Clu-CD34	0.215	0.267663	5.91332e-268
VAMP8	Clu-CD34	0.836	0.514362	6.97865e-268
XRCC6	Clu-CD34	0.525	0.331096	2.1523e-267
ECI2	Clu-CD34	0.182	0.31672	4.3858e-266
NENF	Clu-CD34	0.352	0.288771	6.70037e-266
ECH1	Clu-CD34	0.577	0.308616	7.02243e-266
TAOK3	Clu-CD34	0.324	0.309489	2.38674e-265
FKBP1A	Clu-CD34	0.785	0.433912	3.03764e-265
ZNF207	Clu-CD34	0.413	0.273624	4.47802e-265
PHF14	Clu-CD34	0.222	0.306169	4.52597e-265
C1orf43	Clu-CD34	0.368	0.314652	8.17808e-265
DDT	Clu-CD34	0.509	0.30954	1.01022e-264
UBA7	Clu-CD34	0.158	0.259581	1.54067e-264
BIRC5	Clu-CD34	0.131	0.334673	2.91735e-264
LYRM4	Clu-CD34	0.266	0.277074	4.6562e-264
ADI1	Clu-CD34	0.309	0.303202	5.35754e-264
GRSF1	Clu-CD34	0.25	0.27674	5.81613e-264
XRCC5	Clu-CD34	0.438	0.273077	6.28613e-264
RTN3	Clu-CD34	0.273	0.286242	4.90243e-263
MRPL9	Clu-CD34	0.281	0.266649	7.43605e-263
NUDT3	Clu-CD34	0.193	0.318135	1.03708e-262
DDOST	Clu-CD34	0.4	0.28309	1.07786e-262
SRSF11	Clu-CD34	0.363	0.288102	1.64863e-262
RPS7	Clu-CD34	0.997	0.436662	2.7767e-262
TUBB4B	Clu-CD34	0.266	0.432139	3.43461e-262
PYURF	Clu-CD34	0.634	0.32971	1.39051e-261
UQCC2	Clu-CD34	0.27	0.304378	1.62163e-260
PTMA	Clu-CD34	0.998	0.431692	1.06893e-259
OXA1L	Clu-CD34	0.337	0.3125	1.82228e-259
HSPA9	Clu-CD34	0.279	0.323054	4.94894e-259
PRPF40A	Clu-CD34	0.304	0.349005	7.69196e-259
SUMO2	Clu-CD34	0.763	0.432257	1.3064e-258
C16orf13	Clu-CD34	0.428	0.366123	4.24234e-258
SOD1	Clu-CD34	0.813	0.506443	6.70998e-258
RTFDC1	Clu-CD34	0.329	0.264105	8.14455e-258
MTDH	Clu-CD34	0.51	0.35156	9.78968e-258
SNRPB	Clu-CD34	0.558	0.354766	1.15651e-257
THOC7	Clu-CD34	0.399	0.283231	1.54275e-257
CACYBP	Clu-CD34	0.41	0.307471	4.31946e-257
RNF5	Clu-CD34	0.33	0.314274	4.12076e-256
CSF3R	Clu-CD34	0.26	0.355114	4.82623e-256
SNRPC	Clu-CD34	0.433	0.260333	8.99527e-255
CHTOP	Clu-CD34	0.233	0.252916	9.87066e-255
NDUFAF3	Clu-CD34	0.462	0.346729	1.13967e-254
RNASEH2C	Clu-CD34	0.418	0.330823	1.49405e-254
MRPL23	Clu-CD34	0.554	0.348551	1.61536e-254
RAB37	Clu-CD34	0.197	0.280887	9.67777e-254
PARK7	Clu-CD34	0.774	0.504958	2.40745e-253
KPNB1	Clu-CD34	0.23	0.2646	7.87771e-253
PABPC1	Clu-CD34	0.974	0.536855	1.99015e-251
RP11-1094M14.11	Clu-CD34	0.187	0.256861	5.33184e-251
HLA-A	Clu-CD34	0.927	-0.968878	7.79769e-251
GPN3	Clu-CD34	0.211	0.268793	9.0629e-251
CD44	Clu-CD34	0.556	0.435707	3.17475e-250
MRPL37	Clu-CD34	0.221	0.259282	3.22615e-250
UBE2I	Clu-CD34	0.571	0.306758	5.73948e-250
SDHC	Clu-CD34	0.433	0.254975	1.33493e-249
MYADM	Clu-CD34	0.176	0.31288	8.07345e-249
H1F0	Clu-CD34	0.15	0.344408	2.75684e-248
COMMD1	Clu-CD34	0.273	0.259573	8.13123e-248
APP	Clu-CD34	0.176	0.283668	1.98299e-247
PGK1	Clu-CD34	0.69	0.463273	5.5021e-247
NMRAL1	Clu-CD34	0.234	0.255819	6.86989e-247
XBP1	Clu-CD34	0.57	0.298797	6.16028e-246
TMEM230	Clu-CD34	0.617	0.304918	8.62328e-246
RCN2	Clu-CD34	0.32	0.265205	6.19532e-245
UQCRH	Clu-CD34	0.819	0.505592	1.44654e-244
MGMT	Clu-CD34	0.311	0.262862	1.69418e-244
ERV3-1	Clu-CD34	0.221	0.282812	4.95532e-244
CPSF6	Clu-CD34	0.225	0.281323	7.36928e-244
UBXN4	Clu-CD34	0.317	0.277641	6.53594e-243
CYC1	Clu-CD34	0.438	0.279275	2.38491e-242
UTP11L	Clu-CD34	0.183	0.275585	6.66021e-242
SHFM1	Clu-CD34	0.524	0.259355	1.22934e-241
LINC01003	Clu-CD34	0.123	0.253169	1.4364e-241
CYB5R3	Clu-CD34	0.233	0.280283	4.85972e-241
FGFR1OP2	Clu-CD34	0.337	0.307852	7.09216e-241
PPIA	Clu-CD34	0.867	0.51693	1.05692e-240
ZFAS1	Clu-CD34	0.715	0.396794	1.43905e-240
GADD45GIP1	Clu-CD34	0.556	0.312162	1.60034e-240
SCRN2	Clu-CD34	0.173	0.250542	2.12011e-240
OCIAD1	Clu-CD34	0.438	0.253397	3.10621e-240
AGPAT2	Clu-CD34	0.199	0.280204	4.26669e-240
PTRHD1	Clu-CD34	0.351	0.271081	5.98063e-239
RPSA	Clu-CD34	0.983	0.483483	2.58259e-238
ATP5F1	Clu-CD34	0.639	0.349544	9.67154e-238
OSBPL9	Clu-CD34	0.164	0.265075	7.39544e-236
ACADVL	Clu-CD34	0.309	0.268923	1.30095e-235
SMARCE1	Clu-CD34	0.269	0.271824	1.3542e-235
PDCD6	Clu-CD34	0.515	0.302747	6.2204e-235
PDIA6	Clu-CD34	0.463	0.276291	1.55789e-233
C11orf73	Clu-CD34	0.316	0.268052	9.59528e-233
DHRS4	Clu-CD34	0.188	0.265755	1.74523e-232
TPI1	Clu-CD34	0.799	0.513043	1.86053e-232
ATP5G2	Clu-CD34	0.952	0.5426	2.85722e-232
UQCRFS1	Clu-CD34	0.525	0.336824	4.45919e-232
SUMO3	Clu-CD34	0.457	0.267807	1.19115e-231
HNRNPK	Clu-CD34	0.765	0.444016	1.46806e-231
BST2	Clu-CD34	0.58	0.321941	2.207e-231
ELMO1	Clu-CD34	0.148	0.260477	1.12389e-230
S100A6	Clu-CD34	0.485	-1.40027	4.79473e-230
MRPS14	Clu-CD34	0.253	0.250772	8.45062e-230
DEK	Clu-CD34	0.421	0.294099	1.21132e-229
PGLS	Clu-CD34	0.456	0.262617	2.60136e-229
MRPS18B	Clu-CD34	0.312	0.270089	5.22513e-229
ALDH2	Clu-CD34	0.186	0.276201	6.57177e-229
EIF6	Clu-CD34	0.429	0.254794	1.45255e-228
RNF130	Clu-CD34	0.358	0.357959	1.96348e-228
FNBP1	Clu-CD34	0.327	0.267937	3.9044e-228
YTHDF2	Clu-CD34	0.311	0.291178	7.18511e-228
SPG21	Clu-CD34	0.378	0.2645	8.16621e-228
CBX3	Clu-CD34	0.423	0.259407	1.87351e-227
ANXA7	Clu-CD34	0.422	0.268287	1.77736e-226
PSMA4	Clu-CD34	0.689	0.321484	4.10223e-226
PSMB1	Clu-CD34	0.709	0.355306	6.82184e-225
EIF2A	Clu-CD34	0.308	0.288228	8.35064e-225
TACC3	Clu-CD34	0.186	0.286517	1.25711e-224
SRSF7	Clu-CD34	0.542	0.328038	2.09205e-224
NCL	Clu-CD34	0.33	0.304961	6.45511e-224
LYRM5	Clu-CD34	0.188	0.253073	1.43262e-223
NDUFS2	Clu-CD34	0.36	0.292965	1.43917e-223
CMTM7	Clu-CD34	0.319	0.284007	4.97054e-223
LAMTOR1	Clu-CD34	0.594	0.330105	5.29394e-223
NDUFC1	Clu-CD34	0.416	0.254546	2.93188e-222
NACA	Clu-CD34	0.984	0.44918	4.84528e-222
RPS29	Clu-CD34	0.918	-0.859868	6.00206e-222
TXN2	Clu-CD34	0.333	0.258206	9.29981e-222
POLR1D	Clu-CD34	0.427	0.289315	1.05639e-220
PPHLN1	Clu-CD34	0.357	0.250409	1.13258e-219
XRN2	Clu-CD34	0.308	0.253791	3.75613e-218
RBM4B	Clu-CD34	0.115	0.260074	1.16324e-217
EXOSC8	Clu-CD34	0.24	0.252234	2.04325e-217
RCSD1	Clu-CD34	0.397	0.251817	2.62935e-217
ACP1	Clu-CD34	0.466	0.254076	1.6685e-216
SRI	Clu-CD34	0.514	0.263137	1.88264e-216
SYK	Clu-CD34	0.159	0.261388	3.65942e-216
LMO2	Clu-CD34	0.11	0.347337	6.31916e-215
EIF3F	Clu-CD34	0.792	0.40863	5.5681e-214
MTIF3	Clu-CD34	0.284	0.326984	6.25267e-214
SIVA1	Clu-CD34	0.435	0.2504	1.68281e-213
POLR3K	Clu-CD34	0.17	0.279549	9.53327e-213
RFXANK	Clu-CD34	0.25	0.278315	4.97053e-212
CLIC1	Clu-CD34	0.903	0.449057	8.20734e-212
MMADHC	Clu-CD34	0.345	0.253615	2.1091e-211
RPL4	Clu-CD34	0.982	0.442393	2.26199e-211
NOP16	Clu-CD34	0.134	0.286996	4.83527e-210
UROS	Clu-CD34	0.26	0.265965	6.90741e-210
PA2G4	Clu-CD34	0.413	0.25801	8.42105e-209
CMSS1	Clu-CD34	0.149	0.25147	3.13897e-208
NDUFC2	Clu-CD34	0.616	0.25759	3.61886e-208
EIF3H	Clu-CD34	0.71	0.350123	8.85246e-207
MLXIP	Clu-CD34	0.144	0.254332	7.82956e-206
TMEM106C	Clu-CD34	0.169	0.26171	1.16904e-205
MEF2C	Clu-CD34	0.2	0.254155	2.86895e-205
GNAS	Clu-CD34	0.461	0.282267	2.52356e-203
MRPS21	Clu-CD34	0.527	0.254535	1.29174e-201
GRAMD1A	Clu-CD34	0.193	0.260487	1.74863e-201
COX7A2L	Clu-CD34	0.676	0.278718	6.22978e-201
RABAC1	Clu-CD34	0.632	0.277562	1.58847e-200
CHCHD2	Clu-CD34	0.906	0.49125	5.8871e-200
CASP4	Clu-CD34	0.503	0.259395	6.99116e-198
HNRNPM	Clu-CD34	0.563	0.309805	1.76621e-197
RTCB	Clu-CD34	0.212	0.272722	2.56292e-197
ANXA1	Clu-CD34	0.902	0.454659	3.26997e-197
RPL6	Clu-CD34	0.994	0.367007	7.782e-197
PIM1	Clu-CD34	0.356	0.384755	3.33147e-196
CANX	Clu-CD34	0.276	0.254171	2.82985e-195
CCDC23	Clu-CD34	0.267	0.284402	1.46498e-194
RAC1	Clu-CD34	0.606	0.258919	4.64102e-194
SH3BGRL	Clu-CD34	0.617	0.279324	2.1768e-193
CD59	Clu-CD34	0.219	0.307309	8.717e-192
SEC13	Clu-CD34	0.195	0.270263	6.18251e-191
MYC	Clu-CD34	0.336	0.478864	1.37329e-190
ALDOA	Clu-CD34	0.761	0.338394	8.81771e-190
SYNCRIP	Clu-CD34	0.192	0.278859	2.71817e-188
BRK1	Clu-CD34	0.748	0.327352	1.58983e-186
VBP1	Clu-CD34	0.284	0.268626	5.02042e-186
ZDHHC24	Clu-CD34	0.158	0.255292	8.05004e-185
CISD2	Clu-CD34	0.276	0.269937	6.69184e-184
CUTA	Clu-CD34	0.701	0.254922	1.94883e-183
ATP5J	Clu-CD34	0.669	0.277635	1.04238e-180
HIST1H2BK	Clu-CD34	0.276	0.386061	1.69276e-178
GTF3A	Clu-CD34	0.706	0.251083	1.12927e-177
RBM3	Clu-CD34	0.747	0.353	3.30062e-176
RPL14	Clu-CD34	0.993	0.353641	1.16742e-174
NBEAL1	Clu-CD34	0.627	0.255721	4.88029e-174
TPT1	Clu-CD34	0.989	0.36342	1.32024e-173
PCBP2	Clu-CD34	0.783	0.333562	8.23568e-173
DNAJC4	Clu-CD34	0.231	0.286865	4.23071e-170
GPX4	Clu-CD34	0.735	0.27089	5.06092e-168
GNLY	Clu-CD34	0.041	-3.06408	3.77463e-165
HLA-E	Clu-CD34	0.397	-1.31746	1.77257e-164
ARHGDIB	Clu-CD34	0.967	0.416537	2.32697e-164
KPNA2	Clu-CD34	0.14	0.286037	2.61504e-163
SNX3	Clu-CD34	0.764	0.256668	2.94784e-159
MPP1	Clu-CD34	0.252	0.267045	2.71547e-157
RPL24	Clu-CD34	0.983	0.365458	7.59312e-157
CCL5	Clu-CD34	0.131	-2.57478	1.61955e-156
PSMA7	Clu-CD34	0.75	0.277968	5.90819e-156
SELL	Clu-CD34	0.536	0.320338	2.12867e-154
RPS8	Clu-CD34	0.996	0.299833	4.41579e-152
RPL19	Clu-CD34	0.998	0.276861	1.2553e-149
MT-CO2	Clu-CD34	0.958	-0.505131	1.34266e-148
SRSF5	Clu-CD34	0.84	0.345138	8.60763e-146
HLA-DRA	Clu-CD34	0.833	-0.301762	1.4272e-143
RPL22	Clu-CD34	0.912	0.361835	1.64698e-143
RPLP1	Clu-CD34	0.998	0.269726	4.60774e-141
VIM	Clu-CD34	0.754	0.477799	2.61821e-139
GZMA	Clu-CD34	0.017	-2.07131	8.56343e-139
RPS3A	Clu-CD34	0.998	0.304794	9.55745e-136
BTG1	Clu-CD34	0.316	-1.3137	5.33301e-134
RPL18	Clu-CD34	0.996	0.28999	2.79292e-133
SRP14	Clu-CD34	0.919	0.368578	1.30036e-130
CALM2	Clu-CD34	0.932	0.361368	3.64928e-130
EMP3	Clu-CD34	0.397	-1.18519	5.59453e-129
CYBA	Clu-CD34	0.85	-0.871684	9.12377e-128
S100A4	Clu-CD34	0.791	-1.15694	3.79886e-126
HNRNPA2B1	Clu-CD34	0.807	0.306452	6.16452e-123
RPLP2	Clu-CD34	0.994	-0.445677	3.91756e-122
GZMH	Clu-CD34	0.019	-2.06878	1.10148e-118
RPS11	Clu-CD34	0.966	0.324034	1.10005e-116
CD3E	Clu-CD34	0.067	-1.47183	1.39017e-116
TPM1	Clu-CD34	0.131	0.314854	9.2925e-112
FGFBP2	Clu-CD34	0.015	-1.96143	3.52935e-104
LGALS1	Clu-CD34	0.693	0.512575	4.67365e-103
CD2	Clu-CD34	0.012	-1.3833	1.69739e-101
LTB	Clu-CD34	0.253	-1.58999	2.76551e-97
EEF1D	Clu-CD34	0.944	-0.503479	3.86804e-97
GZMB	Clu-CD34	0.028	-1.51295	2.97029e-94
MYL12A	Clu-CD34	0.764	-0.816024	3.9273e-90
RPL34	Clu-CD34	0.958	-0.508044	2.98592e-88
GZMM	Clu-CD34	0.01	-1.33262	2.84549e-87
H3F3B	Clu-CD34	0.977	0.277313	1.16546e-83
CST7	Clu-CD34	0.075	-1.66554	2.67491e-81
GIMAP4	Clu-CD34	0.007	-1.13067	3.34907e-80
ATP5E	Clu-CD34	0.825	-0.62174	1.43768e-79
SH3BGRL3	Clu-CD34	0.887	-0.67688	1.85437e-79
ACTB	Clu-CD34	0.998	-0.499497	9.68215e-77
JUNB	Clu-CD34	0.114	-1.24524	4.02725e-76
CXCR4	Clu-CD34	0.071	-1.36078	1.24672e-74
LCK	Clu-CD34	0.074	-1.19097	8.51463e-74
S100A9	Clu-CD34	0.054	-2.77576	1.11722e-69
FCN1	Clu-CD34	0.016	-1.71081	2.57171e-68
CALM1	Clu-CD34	0.323	-1.1377	9.74952e-68
CD74	Clu-CD34	0.923	-0.30042	1.75786e-67
S100A8	Clu-CD34	0.087	-3.15287	3.01549e-66
MT-ATP6	Clu-CD34	0.874	-0.508439	4.23574e-65
LYZ	Clu-CD34	0.046	-2.16364	6.45074e-62
NKG7	Clu-CD34	0.331	-2.28249	1.8706e-61
EIF1	Clu-CD34	0.964	-0.362175	9.78565e-59
GIMAP7	Clu-CD34	0.132	-1.09912	6.83763e-58
PTPRC	Clu-CD34	0.132	-1.0761	1.29127e-55
DOK2	Clu-CD34	0.023	-0.897024	1.52728e-55
FCGR3A	Clu-CD34	0.004	-1.1216	3.47468e-50
SERPINA1	Clu-CD34	0.006	-1.01375	5.62495e-50
RPS28	Clu-CD34	0.989	-0.29672	2.00404e-48
MNDA	Clu-CD34	0.007	-0.967382	2.15219e-47
RP11-1143G9.4	Clu-CD34	0.007	-1.17064	8.34339e-47
PFDN5	Clu-CD34	0.941	-0.373079	2.15567e-45
FYB	Clu-CD34	0.036	-0.839796	7.60368e-45
IL7R	Clu-CD34	0.003	-0.821733	8.63846e-45
CD7	Clu-CD34	0.074	-1.03164	6.26242e-44
HBB	Clu-CD34	0.93	-1.32184	7.07121e-42
CCL4	Clu-CD34	0.008	-0.978851	3.25651e-41
RPS27A	Clu-CD34	0.996	-0.275492	7.13483e-41
LAT	Clu-CD34	0.026	-0.87781	8.21072e-41
ISG20	Clu-CD34	0.14	-0.987305	2.6873e-40
CCR7	Clu-CD34	0.004	-0.761416	4.61976e-39
CD27	Clu-CD34	0.01	-0.76209	1.27201e-38
KLRD1	Clu-CD34	0.007	-0.9208	3.51036e-38
HBA2	Clu-CD34	0.559	-1.48136	1.56246e-37
TOMM7	Clu-CD34	0.574	-0.814986	5.04934e-37
ANXA5	Clu-CD34	0.032	-0.711804	1.24887e-34
S100A10	Clu-CD34	0.334	-0.929937	7.13791e-34
IFITM2	Clu-CD34	0.594	-0.94538	1.82458e-33
LGALS3	Clu-CD34	0.021	-0.618863	5.24285e-32
CORO1A	Clu-CD34	0.653	-0.6313	1.27057e-31
GIMAP5	Clu-CD34	0.048	-0.797293	1.44589e-30
TXNIP	Clu-CD34	0.416	-0.828484	1.92943e-28
PRF1	Clu-CD34	0.114	-1.28881	2.53292e-28
HLA-F	Clu-CD34	0.044	-0.725012	1.17477e-27
CD48	Clu-CD34	0.205	-0.851778	8.14229e-26
CD247	Clu-CD34	0.041	-0.824183	1.55574e-25
RAP1B	Clu-CD34	0.335	-0.2715	2.01603e-24
PPBP	Clu-CD34	0.042	-1.47621	4.89047e-22
RPS26	Clu-CD34	0.799	-0.59184	7.3468e-22
RPL38	Clu-CD34	0.902	-0.349268	9.40077e-22
HBD	Clu-CD34	0.167	-0.922947	3.00016e-21
CAP1	Clu-CD34	0.4	-0.27091	5.35394e-21
FCER1G	Clu-CD34	0.158	-1.19006	1.14076e-20
KLRB1	Clu-CD34	0.035	-0.82052	3.01992e-20
CFD	Clu-CD34	0.08	-1.06168	3.56385e-20
FAM49B	Clu-CD34	0.35	-0.288327	7.89131e-20
ITM2B	Clu-CD34	0.691	-0.586689	1.20389e-18
NDUFA6	Clu-CD34	0.244	-0.253739	8.8374e-18
MS4A6A	Clu-CD34	0.048	-0.727394	1.52677e-17
ZFP36	Clu-CD34	0.072	-0.661858	2.65506e-16
IL2RG	Clu-CD34	0.469	-0.355215	3.25851e-16
SELK	Clu-CD34	0.309	-0.264934	9.42231e-16
VAMP2	Clu-CD34	0.515	-0.267782	1.47371e-15
MT2A	Clu-CD34	0.292	-0.331197	2.25168e-15
SIGIRR	Clu-CD34	0.198	-0.271561	2.26595e-15
MRPL41	Clu-CD34	0.24	-0.26405	6.85758e-15
NDUFB1	Clu-CD34	0.272	-0.259836	1.48483e-14
TYMP	Clu-CD34	0.115	-1.01883	2.11428e-14
IFI27L2	Clu-CD34	0.063	-0.61314	2.39571e-14
CD3G	Clu-CD34	0.048	-0.580014	8.92858e-14
KLRG1	Clu-CD34	0.132	-0.305633	9.89296e-14
BLOC1S1	Clu-CD34	0.411	-0.297959	2.14537e-13
HBA1	Clu-CD34	0.495	-1.38529	2.9912e-13
AP1S2	Clu-CD34	0.274	-0.343694	8.9967e-13
DBI	Clu-CD34	0.449	-0.293488	5.01707e-12
LITAF	Clu-CD34	0.157	-0.800209	5.58001e-12
KRT10	Clu-CD34	0.326	-0.250036	1.89773e-11
PIK3IP1	Clu-CD34	0.062	-0.615853	2.75843e-11
RGS10	Clu-CD34	0.332	-0.305317	3.15667e-11
LAMTOR4	Clu-CD34	0.534	-0.289583	1.41275e-10
UBC	Clu-CD34	0.777	-0.466429	3.34426e-10
CCND3	Clu-CD34	0.306	-0.319528	4.88506e-10
ITGB2	Clu-CD34	0.287	-0.814004	1.0822e-09
ID2	Clu-CD34	0.217	-0.707772	1.65627e-09
IRF1	Clu-CD34	0.24	-0.30137	1.68058e-09
CD79B	Clu-CD34	0.199	-0.525709	3.21168e-09
FKBP8	Clu-CD34	0.549	-0.386013	9.86699e-09
HLA-DPA1	Clu-CD34	0.572	-0.409124	1.30857e-08
TNFAIP8	Clu-CD34	0.077	-0.614959	1.92737e-08
DDX18	Clu-CD34	0.217	-0.260454	2.11759e-08
MYEOV2	Clu-CD34	0.322	-0.345155	5.72381e-08
SELT	Clu-CD34	0.349	-0.322796	9.32341e-08
SEC62	Clu-CD34	0.35	-0.321807	1.27272e-07
TYROBP	Clu-CD34	0.364	-1.37095	2.2221e-07
JAK1	Clu-CD34	0.18	-0.263052	2.78511e-07
PFN1	Clu-CD34	0.982	-0.262605	6.6527e-07
CYTIP	Clu-CD34	0.078	-0.568683	1.01896e-06
RNH1	Clu-CD34	0.241	-0.255734	1.42055e-06
CA1	Clu-CD34	0.132	-1.0451	1.48373e-06
C1orf162	Clu-CD34	0.162	-0.596246	2.62402e-06
FKBP11	Clu-CD34	0.137	-0.295121	2.86262e-06
C14orf2	Clu-CD34	0.317	-0.287137	3.00927e-06
STK17A	Clu-CD34	0.108	-0.612509	4.50353e-06
STK4	Clu-CD34	0.114	-0.62959	5.06061e-06
HLA-DRB1	Clu-CD34	0.576	-0.541924	7.27489e-06
HLA-DQA1	Clu-CD34	0.067	-0.553806	1.0622e-05
CCDC109B	Clu-CD34	0.244	-0.312751	1.41524e-05
CRIP1	Clu-CD34	0.202	-0.744231	4.21979e-05
C10orf54	Clu-CD34	0.288	-0.321913	5.94077e-05
ANXA2	Clu-CD34	0.2	-0.685763	6.30012e-05
CDK2AP2	Clu-CD34	0.158	-0.263988	7.88046e-05
PPP2R5C	Clu-CD34	0.089	-0.662192	0.000133973
CARD16	Clu-CD34	0.191	-0.69242	0.000134805
S100A11	Clu-CD34	0.567	-0.519318	0.00022065
NDUFB2	Clu-CD34	0.489	-0.387059	0.000395617
COTL1	Clu-CD34	0.254	-0.87726	0.000563031
CIB1	Clu-CD34	0.339	-0.393417	0.000730305
RPL39	Clu-CD34	0.432	-0.331593	0.00106656
ZAP70	Clu-CD34	0.111	-0.260304	0.00168125
TMA7	Clu-CD34	0.795	-0.383772	0.00185401
WIPF1	Clu-CD34	0.154	-0.344228	0.00449901
RPL36AL	Clu-CD34	0.815	-0.375154	0.00517865
ANXA6	Clu-CD34	0.208	-0.368008	0.00538708
NDUFA3	Clu-CD34	0.347	-0.354819	0.00694512
